# 1 Integrated time-course omics analysis distinguishes immediate therapeutic 2 response from acquired resistance

3 Genevieve Stein-O'Brien<sup>1,2\*</sup>, Luciane T Kagohara<sup>3\*</sup>, Sijia Li<sup>3\*</sup>, Manjusha Thakar<sup>3</sup>, Ruchira Ranaweera<sup>3,4</sup>,  
4 Hiroyuki Ozawa<sup>5</sup>, Haixia Cheng<sup>6</sup>, Michael Considine<sup>3</sup>, Alexander V Favorov<sup>3,7</sup>, Ludmila V Danilova<sup>3,7</sup>, Joseph  
5 A Califano<sup>8</sup>, Evgeny Izumchenko<sup>9</sup>, Daria A Gaykalova<sup>9</sup>, Christine H Chung<sup>3,4,+</sup>, Elana J Fertig<sup>3,+</sup>.

## 6 Affiliations:

- 7 1. Institute of Genetic Medicine, Johns Hopkins University, Baltimore, MD, USA
- 8 2. Lieber Institute for Brain Development, Baltimore, MD, USA
- 9 3. Department of Oncology, Sidney Kimmel Comprehensive Cancer Center, Johns Hopkins University,  
0 Baltimore, MD, USA
- 1 4. Department of Head and Neck-Endocrine Oncology, Moffitt Cancer Center, Tampa, FL, USA
- 2 5. Department of Otorhinolaryngology-Head and Neck Surgery, Keio University School of Medicine, Tokyo,  
3 Japan
- 4 6. Department of Surgery - Otolaryngology-Head and Neck Surgery, University of Utah, Salt Lake City, UT
- 5 7. Laboratory of Systems Biology and Computational Genetics, Vavilov Institute of General Genetics,  
6 Russian Academy of Sciences, Moscow, Russia
- 7 8. Department of Surgery, UC San Diego Moores Cancer Center, La Jolla, CA, USA
- 8 9. Department of Otolaryngology-Head and Neck Surgery, Johns Hopkins University, Baltimore, MD, USA
- 9

0 \* These authors contributed equally for this manuscript.

1 + Co-corresponding authors

## 3 Email addresses:

4 Genevieve Stein-O'Brien: [gsteinobrien@jhmi.edu](mailto:gsteinobrien@jhmi.edu)  
5 Luciane T Kagohara: [Itsukam1@jhmi.edu](mailto:Itsukam1@jhmi.edu)  
6 Sijia Li: [sli61@jhu.edu](mailto:sli61@jhu.edu)  
7 Manjusha Thakar: [mthakar3@jhmi.edu](mailto:mthakar3@jhmi.edu)  
8 Ruchira Ranaweera: [Ruchira.Ranaweera@moffitt.org](mailto:Ruchira.Ranaweera@moffitt.org)  
9 Hiroyuki Ozawa: [ozakky@cb.mbn.or.jp](mailto:ozakky@cb.mbn.or.jp)  
0 Haixia Cheng: [haixia.cheng@hci.utah.edu](mailto:haixia.cheng@hci.utah.edu)  
1 Michael Considine: [mconsid3@jhmi.edu](mailto:mconsid3@jhmi.edu)  
2 Alexander Favorov: [favorov@sensi.org](mailto:favorov@sensi.org)  
3 Ludmila Danilova: [ldanilo1@jhmi.edu](mailto:ldanilo1@jhmi.edu)  
4 Joseph A Califano: [jcalifano@ucsd.edu](mailto:jcalifano@ucsd.edu)  
5 Evgeny Izumchenko: [izumchen@jhmi.edu](mailto:izumchen@jhmi.edu)  
6 Daria A Gaykalova: [dgaykal1@jhmi.edu](mailto:dgaykal1@jhmi.edu)  
7 Christine H Chung: [Christine.Chung@moffitt.org](mailto:Christine.Chung@moffitt.org)  
8 Elana J Fertig: [ejfertig@jhmi.edu](mailto:ejfertig@jhmi.edu)  
9

0 Key words: Acquired resistance, data integration, time-course analysis, genomics, epigenetics

1  
2

3 **Abstract**

4 **Background:** Targeted therapies specifically act by blocking the activity of genes that are critical for  
5 tumorigenesis. However, most cancers acquire resistance and long-term disease control is rarely observed.  
6 Knowing the timing of molecular changes responsible for the development of acquired resistance can enable  
7 optimization of alterations to patients' treatments. Clinically, acquired therapeutic resistance can only be  
8 studied at a single time point in resistant tumors. To determine the dynamics of these molecular changes, we  
9 obtained high throughput omics data weekly during the development of cetuximab resistance in a head and  
0 neck cancer model.

1 **Results:** An unsupervised algorithm, CoGAPS, quantified the evolving transcriptional and epigenetic  
2 changes. Further applying a PatternMarker statistic to the results from CoGAPS enabled novel heatmap-  
3 based visualization of the dynamics in these time-course omics data. We demonstrate that transcriptional  
4 changes resulted from immediate therapeutic response and resistance whereas epigenetic alterations only  
5 occurred with resistance. Integrated analysis demonstrated delayed onset of changes in DNA methylation  
6 relative to transcription, suggesting that resistance was stabilized epigenetically.

7 **Conclusions:** Genes with epigenetic alterations associated with resistance that had concordant expression  
8 changes were hypothesized to stabilize resistance. These genes include *FGFR1*, which was associated with  
9 EGFR inhibitor resistance previously. Thus, integrated omics analysis distinguishes the timing of molecular  
0 drivers of resistance. Our findings are a relevant step into the better understanding of the time course  
1 progression of changes resulting in acquired resistance to targeted therapies. This is an important  
2 contribution to the development of alternative treatment strategies that would introduce new drugs before the  
3 resistant phenotype develops.

4

5

## 6 BACKGROUND

7 Cancer targeting therapeutic agents inhibit specific key role players in the regulation of molecular pathways  
8 essential for tumor development and maintenance [1]. These therapies prolong survival but are not curative.  
9 Most patients will develop acquired resistance within the first few years of treatment [2]. Although a wide  
0 variety of molecular alterations that confer resistance to treatment have been described, the mechanisms and  
1 timing of their evolution are still poorly characterized [3,4]. Serial biopsies during the prolonged treatment  
2 period are invasive, expensive, and impractical for patients. Thus, molecular alterations associated with  
3 acquired resistance from previous studies are only known when the tumor has already developed resistance.  
4 As a result, the understanding of how these changes develop and are incorporated by the tumor cells is  
5 restricted to few time points along the treatment. The lack of adequate time course datasets makes it  
6 challenging to delineate the two predominant hypotheses for how therapeutic resistance develops: the  
7 presence of small populations of resistant cells that will survive the treatment and repopulate the tumor; or  
8 the development of *de novo* resistance by the tumor cells [3,5]. Characterization of the dynamics of genomic  
9 alterations induced during acquired resistance can identify targetable oncogenic drivers and determine the  
0 best time point to introduce alternative therapeutic strategies to avoid resistance establishment [6].

1 Inhibitors against Epidermal Growth Factor Receptor (EGFR) represent a common class of targeted  
2 therapeutics. Cetuximab, a monoclonal antibody against EGFR, is FDA approved for the treatment of  
3 metastatic colorectal cancer and head and neck squamous cell carcinoma (HNSCC) [7]. As with other  
4 targeted therapies, stable response is not observed for a long period and virtually all patients invariably  
5 develop acquired resistance [8]. Recent advances in *in vitro* models of acquired cetuximab resistance [9]  
6 provide a unique opportunity to study the time-course of genetic events resulting in acquired resistance. Cell  
7 lines chronically exposed to the targeted agent develop resistance and can be sequentially collected during  
8 the course of treatment to evaluate the progressive molecular changes. Previous studies to assess the  
9 mechanisms of acquired cetuximab resistance have been limited to comparing the genomic profile of the  
0 parental sensitive cell line to stable clones with acquired resistance [9–11]. Therefore, these studies fail to  
1 capture the dynamics of acquired molecular alterations during the evolution of therapeutic resistance.  
2 Approaches using combined experimental and bioinformatics tools that would adjust to different tumor

3 models and therapeutic agents are fundamental tools to overcome issues related to sample availability and  
4 serial time point data analysis.

5 Even with advances in experimental sampling approaches, time-course high throughput data alone is  
6 insufficient to determine molecular drivers of therapeutic resistance. A novel serial, multi-platform genomics  
7 analysis is essential to untangle specific and targetable signaling changes that drive cetuximab resistance in  
8 HNSCC. Current supervised bioinformatics algorithms that find time-course patterns in genomic data adjust  
9 linear models to correlate molecular profiles with known temporal patterns [12–15]. However, these  
0 algorithms cannot quantify the rate of genomics alterations relative to that of the input phenotype. Other  
1 algorithms [16–21] enhance such inference by using prior knowledge of gene relationships to find coherent,  
2 dynamic regulatory relationships that are linked to pathways. Many of these algorithms trace individual  
3 phenotypes or individual genomics platforms. Their ability to determine drivers of gene expression associated  
4 with acquired resistance from time-course data in multiple experimental conditions and multiple genomics  
5 data modalities is emerging [22]. On the other hand, unsupervised compressed sensing algorithms can  
6 simultaneously quantify the dynamics and infer the gene regulatory networks directly from the input time  
7 course data [23]. Nonetheless, visualization tools for inference of dynamics from unsupervised algorithm are  
8 limited.

9 In this study, we used an *in vitro* HNSCC cell line model to induce resistance and measure the molecular  
0 changes using multiple high throughput assays while the resistant phenotype developed. We measured DNA  
1 methylation and gene expression to determine the functional impact of the inferred epigenetic alterations. The  
2 association of DNA methylation with acquired cetuximab resistance *in vitro* and *in vivo* have been previously  
3 described [24]. An intrinsic sensitive HNSCC cell line (SCC25) was treated for 11 weeks with cetuximab or  
4 phosphate buffered saline (PBS) and cells were collected weekly. In total, high throughput analysis for gene  
5 expression and methylation was performed in 11 treated and 11 untreated samples. Using the 22 samples  
6 generated, we used the Bayesian non-negative matrix factorization algorithm CoGAPS [25] to infer specific  
7 patterns of gene expression and DNA methylation that developed according to the gradual establishment of  
8 the acquired cetuximab resistance. Gene expression also had a pattern associated with immediate

9 therapeutic response. We selected genes uniquely associated with these changes using a PatternMarker  
0 statistic [25]. Plotting expression or methylation of genes with the PatternMarker statistic enabled novel  
1 visualization of the dynamics of these alterations from high throughput data. Analysis of the CoGAPS  
2 patterns demonstrated that onset of methylation changes associated with resistance were temporally delayed  
3 relative to expression changes and involved different genes, suggesting that epigenetic alterations stabilize  
4 the gene signatures relevant to the resistant phenotype. Specifically, the DNA methylation PatternMarker  
5 genes were selected as putative epigenetic drivers. Therefore, we next performed correlation analysis of  
6 PatternMarkers of the DNA methylation patterns with gene expression to identify the subset of genes with  
7 tight temporal concordance implying direct epigenetic regulation. Among these genes *FGFR1* had the  
8 strongest correlation between gene expression and DNA methylation in a cetuximab resistant sub-clone  
9 generated from the same parental cell line. Previous studies associate *FGFR1* increased expression with  
0 acquired cetuximab resistance in HNSCC patients [26–28]. In this study, we also demonstrated that  
1 epigenetic changes of *FGFR1* are observed in HNSCC tumors in TCGA. This work represents the first  
2 integrated time-course analyses to determine the drivers of acquired resistance, suggesting a direct link  
3 between epigenetic regulation of *FGFR1* gene expression and the development of acquired resistance. Both  
4 the experimental and bioinformatics methods developed could be applicable to other molecular platforms,  
5 therapeutics, and cancer types.

6

## 7 **METHODS**

### 8 **Cell lines and materials**

9 SCC25 cells were purchased from American Type Culture Collection (ATCC). Cells were cultured in  
0 Dulbecco's Modified Eagle's medium and Ham's F12 medium supplemented with 400ng/mL hydrocortisone  
1 and 10% fetal bovine serum and incubated at 37°C and 5% carbon dioxide. SCC25 was authenticated using  
2 short tandem repeat (STR) analysis kit PowerPlex16HS (Promega, Madison, WI) through the Johns Hopkins  
3 University Genetic Resources Core Facility. Cetuximab (Lilly, Indianapolis, IN) was purchased from the Johns  
4 Hopkins Pharmacy.

## 5 **Experimental protocol to establish time-course during acquisition of cetuximab resistance in SCC25**

6 The HNSCC cell line SCC25 (intrinsically sensitive to cetuximab) was treated with 100nM cetuximab every  
7 three days for 11 weeks (generations G1 to G11). On the eighth day, cells were harvested. Sixty thousand  
8 cells were replated for another week of treatment with cetuximab and the remaining cells were separately  
9 collected for: (1) RNA isolation (gene expression analysis); (2) DNA isolation (DNA methylation analysis); (3)  
0 proliferation assay and (4) storage for future use. All steps were repeated for a total of 11 weeks. In parallel  
1 with the cetuximab treated cells, we generated controls that received the same correspondent volume of PBS  
2 (phosphate buffered saline). Cells were plated in several replicates each time at the same initial density. The  
3 replicates were then harvested and pooled to provide enough cells for genetic, epigenetic and proliferation  
4 assays. To achieve adequate final cell confluence and number of cells for the experimental analysis of each  
5 generation, cetuximab and PBS treated cells were plated in different flask sizes. Cells treated with cetuximab  
6 were plated in multiple T75 (75cm<sup>2</sup>) flasks (60,000 cells/flask) that were combined on the eighth day. PBS  
7 treated cells were plated in a single T175 (175cm<sup>2</sup>) flask (60,000 cells). This design was selected considering  
8 the growth inhibition of the earliest cetuximab generations and to control confluence of the PBS controls at  
9 the collection time (**Supplemental Fig. 1**).

## 0 **Cell proliferation and colony formation assays**

1 Cell proliferation events were measured using the Click-iT Plus EdU Flow Cytometry Assay Kit Alexa Fluor  
2 488 Picolyl Azide (Life Technologies, Carlsbad, CA) according to manufacturer's instructions. The cetuximab  
3 generations were considered resistant when the frequency of proliferating cells was higher than in the PBS  
4 control generations.

5 Anchorage-independent growth assay was used to further confirm the development of resistance. The  
6 parental SCC25 and the late G10 resistant cells were treated with different concentrations of cetuximab  
7 10nM, 100nM and 1000nM. Number of colonies was compared to the same cells treated with PBS. Colony  
8 formation assay in Matrigel (BD Biosciences, Franklin Lakes, NJ) was performed as described previously  
9 [29].

## 0 **Stable SCC25 cetuximab resistant single clones (CTXR clones)**

1 Resistance to cetuximab was induced in an independent passage of SCC25 cells. After resistance was  
2 confirmed, single cells were isolated and grown separately to generate the isogenic resistant single cell  
3 clones (CTXR). In total, 11 CTXR clones were maintained in culture without addition of cetuximab. With the  
4 exception of one clone (CTXR6), all CTXR clones presented substantial survival advantage compared to the  
5 parental SCC25, as reported by Cheng et al. [30].

6 Proliferation assay was performed to confirm cetuximab resistance in the CTXR clones compared to the  
7 parental SCC25. A total of 1000 cells were seeded in 96-well plates in quadruplicate for each condition. PBS  
8 or cetuximab (10nM, 100nM or 1000nM) was added after 24 and 72 hours and cells were maintained in  
9 culture for 7 days. AlamarBlue reagent (Invitrogen, Carlsbad, CA) at a 10% final concentration was incubated  
0 for 2 hours and fluorescence was measured according to the manufacturer's recommendations (545nm  
1 excitation, 590nm emission). Resistance in the CTXR clones was confirmed when the proliferation rates were  
2 higher than in the PBS treated SCC25 cells.

### 3 **RNA-sequencing (RNA-seq) and data normalization**

4 RNA isolation and sequencing were performed for the parental SCC25 cells (G0) and each of the cetuximab  
5 and PBS generations (G1 to G11) and the CTXR clones at the Johns Hopkins Medical Institutions (JHMI)  
6 Deep Sequencing & Microarray Core Facility. RNA-seq was also performed for two additional technical  
7 replicates of parental SCC25 cell line to distinguish technical variability in the cell line from acquired  
8 resistance mechanisms. Total RNA was isolated from a total of  $1 \times 10^6$  cells using the AllPrep DNA/RNA Mini  
9 Kit (Qiagen, Hilden, Germany) following manufacturer's instructions. The RNA concentration was determined  
0 by the spectrophotometer Nanodrop (Thermo Fisher Scientific, Waltham, MA) and quality was assessed  
1 using the 2100 Bioanalyzer (Agilent, Santa Clara, CA) system. An RNA Integrity Number (RIN) of 7.0 was  
2 considered as the minimum to be used in the subsequent steps for RNA-seq. Library preparation was  
3 performed using the TrueSeq Stranded Total RNAseq Poly A1 Gold Kit (Illumina, San Diego, CA), according  
4 to manufacturer's recommendations, followed by mRNA enrichment using poly(A) enrichment for ribosomal  
5 RNA (rRNA) removal. Sequencing was performed using the HiSeq platform (Illumina) for 2X100bp  
6 sequencing. Reads were aligned to hg19 with MapSplice [31] and gene expression counts were quantified

7 with RSEM [32]. Gene counts were upper-quartile normalized and log transformed for analysis following the  
8 RSEM v2 pipeline used to normalize TCGA RNA-seq data [33]. All RNA-seq data from this study is available  
9 from GEO (GSE98812) as part of SuperSeries GSE98815.

## 0 **DNA methylation hybridization array and normalization**

1 Genome-wide DNA methylation analysis was performed on the same samples as RNA-seq using the Infinium  
2 HumanMethylation450 BeadChip platform (Illumina) at the JHMI Sidney Kimmel Cancer Center Microarray  
3 Core Facility. Briefly, DNA quality was assessed using the PicoGreen DNA Kit (Life Technologies) and 400ng  
4 of genomic DNA was bisulfite converted using the EZ DNA Methylation Kit (Zymo Research, Irvine, CA)  
5 following manufacturer's recommendations. A total volume of 4 $\mu$ L of bisulfite-converted DNA was denatured,  
6 neutralized, amplified and fragmented according to the manufacturer's instructions. Finally, 12 $\mu$ L of each  
7 sample were hybridized to the array chip followed by primer-extension and staining steps. Chips were image-  
8 processed in the Illumina iScan system. Data from the resulting iDat files were normalized with funnorm  
9 implemented in the R/Bioconductor package minfi (version 1.16.1) [34]. Methylation status of each CpG site  
0 was computed from the signal intensity in the methylated probe ( $M$ ) and unmethylated probe ( $U$ ) as a  $\beta$  value  
1 as follows:

$$2 \quad \beta = \frac{M}{M+U}.$$

3 Annotations of the 450K probes to the human genome (hg19) were obtained from the R/Bioconductor  
4 package FDb.InfiniumMethylation.hg19 (version 2.2.0). Probes on sex chromosomes or annotated to SNPs  
5 were filtered from analysis. The CpG island probe located closest to the transcription start site was selected  
6 for each gene. Genes with CpG island probes less than 200bp from the transcription start site were retained  
7 to limit analysis to CpG island promoter probes for each gene. Probes are said to be unmethylated for  
8  $\beta < 0.1$  and methylated for  $\beta > 0.3$  based upon thresholds defined in TCGA analyses [33]. All DNA  
9 methylation data from this study is available from GEO (GSE98813) as part of SuperSeries GSE98815.

## 0 **Hierarchical clustering and CoGAPS analysis**



1 Unless otherwise specified, all genomics analyses were performed in R and code for these analyses is  
2 available from <https://sourceforge.net/projects/scc25timecourse>.

3 The following filtering criterion for genes from the profiling of the time course data from generations of  
4 cetuximab treated cells was used. Genes from RNA-seq data were selected if they had log fold change  
5 greater than 1 between any two time points of the same condition and less than 2 between the replicate  
6 control samples at time zero (5,940 genes). CpG island promoter probes for each gene were retained if the  
7 gene switched from unmethylated ( $\beta < 0.1$ ) to methylated ( $\beta > 0.3$ ) in any two samples of the time course  
8 (1,087 genes). We used the union of the sets of genes retained from these filtering criteria on either data  
9 platform for analysis, leaving a total of 6,445 genes in RNA-seq and 4,703 in DNA methylation.

0 Hierarchical clustering analysis was performed with Pearson correlation dissimilarities between genes and  
1 samples on all retained genes. CoGAPS analysis was performed on both log transformed RNA-seq data and  
2 DNA methylation  $\beta$  values, independently using the R/Bioconductor package CoGAPS [35] (version 2.9.2).  
3 CoGAPS decomposed the data according to the model

4

$$D_{i,j} \sim \mathcal{N}\left(\sum_{k=1}^p A_{i,k} P_{k,j}, \Sigma_{i,j}\right),$$

5 where  $\mathcal{N}$  represents a univariate normal distribution, matrices  $\mathbf{A}$  and  $\mathbf{P}$  are learned from the data for a  
6 specified number of dimensions  $p$ ,  $\Sigma_{i,j}$  is an estimate of the standard deviation of each row and column of  
7 the data matrix  $\mathbf{D}$ , and  $i$  represents each gene and  $j$  each sample. In this decomposition, each row of the  
8 pattern matrix  $\mathbf{P}$  quantifies the relative association of each sample with a continuous vector of relative gene  
9 expression changes in the corresponding column of  $\mathbf{A}$ . These relative gene weights are called meta-  
0 pathways, and the reduction of the high-dimensional data into fewer reductions through this matrix  
1 factorization represents an established form of compressed sensing in genomics. The standard deviation of  
2 the expression data was 10% of the signal with a minimum of 0.5. The standard deviation of DNA methylation  
3 data under the assumption that  $\beta$  values follow a beta distribution is

4

$$\Sigma_{i,j}^{\beta} = \sqrt{\frac{\beta_{i,j}(1-\beta_{i,j})}{M_{i,j} + U_{i,j} + 1}}$$

5

CoGAPS was run for a range of 2 to 10 dimensions  $p$  for expression and 2 to 5 for DNA methylation.

6

Robustness analysis with ClutrFree [36] determined that the optimal number of dimensions  $p$  for expression

7

was 5. DNA methylation was run in 4 parallel sets using GWCoGAPS [25]. In DNA methylation, the maximum

8

number of patterns that modeled resistance mechanisms over and above technical variation in replicate

9

samples of SCC25 was three. Gene sets representative of the meta-pathway were derived for each pattern

0

using the PatternMarkers statistics [25]. Gene set activity was estimated with the gene set statistic

1

implemented in calcCoGAPSSStat of the CoGAPS R/Bioconductor package [35]. Comparisons between DNA

2

methylation and gene expression values for PatternMarkerGenes or from CoGAPS patterns and amplitudes

3

were computed with Pearson correlation.

4

#### **Cetuximab resistance signatures and EGFR network**

5

In a previous study, CoGAPS learned a meta-pathway from gene expression data corresponding to

6

overexpression of the HRAS<sup>Val12D</sup> in the HaCaT model of HPV- HNSCC premalignancy. That study

7

associated the CoGAPS HaCaT-HRAS meta-pathway with gene expression changes in acquired cetuximab

8

resistance in the HNSCC cell line UMSCC1 [37]. In the current study, we applied the PatternMarkers

9

statistics [25] to the previously published CoGAPS analysis of these data to derive a gene set from this meta-

0

pathway called HACAT\_HRAS\_CETUXIMAB\_RESISTANCE or HACAT\_RESISTANCE. In addition, we

1

searched MSigDB [38] (version 5.2) for all gene sets associated with resistance to EGFR inhibition. In this

2

search, we found the gene sets COLDREN\_GEFITINIB\_RESISTANCE\_DN and

3

COLDREN\_GEFITINIB\_RESISTANCE\_UP representing resistance to the EGFR inhibitor gefitinib in non-

4

small-cell lung cancer cell lines [39]. Gene sets of transcription factor targets were obtained from

5

experimentally validated targets annotated in the TRANSFAC [40] professional database (version 2014.1).

6

#### **Sources and analysis of human tumor genomics data**

7 Genomics analyses of TCGA was performed on level 3 RNA-seq and DNA methylation data from the 243  
8 HPV-negative HNSCC samples from the freeze set for publication [33]. DNA methylation data was analyzed  
9 for the same CpG island promoter probes obtained in the cell line studies. Pearson correlation coefficients  
0 were computed in R to associate different molecular profiles.

1 Analysis was also performed on gene expression data measured with Illumina HumanHT-12 WG-DASL V4.0  
2 R2 expression beadchip arrays on samples from patients treated with cetuximab from Bossi et al [41], using  
3 expression normalization and progression-free survival groups as described in the study. Data was obtained  
4 from the GEO GSE65021 series matrix file. We performed t-tests in R on the probe that had the highest  
5 standard deviation of expression values for each gene.

6

## 7 **RESULTS**

### 8 **Prolonged exposure to cetuximab induces resistance**

9 SCC25 is among the most sensitive HNSCC cell lines to cetuximab but can acquire resistance during a long-  
0 term exposure to cetuximab [30]. This cell line is one of two HNSCC cell lines shown in the literature to  
1 develop isogenic clones that are resistance to cetuximab from long term exposure [10], with a third model  
2 developing resistance to erlotinib from contamination by HeLa [9]. In this study, cetuximab resistance was  
3 induced by exposing the SCC25 cells to the targeted therapeutic agent for a period of eleven weeks (CTX-G1  
4 to -G11) (**Supplemental Fig. 1**). The SCC25 cells treated with PBS were used as time-matched controls  
5 (PBS-G1 to -G11). Response to cetuximab was determined by comparing the proliferation rates between  
6 CTX and PBS generations. Proliferation of the PBS generations was stable throughout the eleven weeks (G1  
7 to G11). Conversely, proliferation of the CTX generations progressively increased over each week (**Fig. 1**).  
8 Relative to the untreated controls, the growth of the treated cells was initially (CTX-G1) inhibited until CTX-  
9 G3. Starting at CTX-G4, the cells became resistant to the anti-proliferative effects of cetuximab and gained  
0 stable growth advantages compared to the untreated controls.

1 Comparison of proliferation rates between generations of CTX treated cells relative to generations of cells  
2 treated PBS enabled us to conclude that cell growth advantages arise from chronic cetuximab treatment and  
3 were associated with resistance rather than prolonged cell culturing. We mirrored the changes in proliferation  
4 rates with clinical responses seen in HNSCC tumors treated with cetuximab (**Fig. 1**, top panel). Specifically,  
5 we inferred that the decreased growth rates in CTX-G1 to -G3 represented initial stages of treatment with a  
6 decrease in tumor size. Then, the switch from decreased to increased growth rates during CTX-G3 to -G4  
7 represented stable disease without tumor outgrowth. Finally, the higher proliferation in cetuximab-treated  
8 cells starting at CTX-G4 represented rapid outgrowth after acquired resistance.

9 Because higher proliferation in treated than untreated cells started at CTX-G4, this was the timepoint at which  
0 acquired cetuximab resistance began and all subsequent timepoints continue to acquire stable cetuximab  
1 resistance. The resistant CTX generation 10 (CTX-G10) also presented enhanced anchorage-independent  
2 growth when compared to the parental SCC25 (G0) at different concentrations of cetuximab (two-way anova  
3 with multiple comparisons p-value < 0.01 for each concentration, **Supplemental Fig. 2**), representing the  
4 stabilization of cetuximab resistance in later generations.

### 5 **Treatment vs. control gene expression changes dominated clustering and immediate therapeutic** 6 **response was confounded with changes from acquired resistance**

7 To characterize the gene expression changes occurring as cells acquire cetuximab resistance, we collected  
8 RNA-seq data for the parental SCC25 cell line (G0) and from each generation of CTX- and PBS-treated cells.  
9 The RNA-seq data hierarchical unsupervised clustering separated genes with expression changes in treated  
0 and untreated generations (**Fig. 2A**). Clustering analysis of samples (**Supplemental Fig. 3**) further  
1 distinguished clusters with gene expression changes in stages with cetuximab sensitivity (CTX-G1 to CTX-  
2 G3), early stages of resistance (CTX-G4 to CTX-G8), and late stages of resistance (CTX G9-G11).  
3 Expression changes at these distinct stages were shared between numerous genes. Confounding by  
4 changes resulting from immediate therapeutic response made identification of resistance-specific gene  
5 expression changes impossible with clustering.

6 Similar separation of stages of cetuximab response were observed in clustering analysis of gene signatures  
7 previously described in HNSCC and non-small cell lung cancer cell line models resistant to cetuximab or  
8 gefitinib (anti-EGFR small molecule), respectively [37,39] (**Supplemental Fig. 4**). For these genes, changes  
9 during early stages of resistance clustered for CTX-G4 to CTX-G6 as distinct from later stages for CTX G7-  
0 11. Nevertheless, these gene signatures also clustered samples with gene expression changes at early  
1 stages (CTX-G1 to G3) as distinct from samples from PBS treated generations. However, these analyses  
2 were insufficient to quantify the relative dynamics of genes associated with immediate response to therapy or  
3 subsequent acquired resistance.

#### 4 **CoGAPS analysis of gene expression distinguished patterns of acquired resistance from immediate** 5 **therapeutic response**

6 To define gene expression signatures for treatment effect and cetuximab resistance, we applied CoGAPS  
7 [25] Bayesian matrix factorization algorithm to the time-course gene expression data. Bayesian non-negative  
8 matrix factorization with algorithms such as CoGAPS have already proven highly effective in relating gene  
9 expression changes to patterns related to EGFR inhibition [42], perturbation of nodes in the EGFR network  
0 [43], and time course dynamics of targeted therapeutics. CoGAPS is an unsupervised matrix factorization  
1 algorithm that simultaneously infers the relative magnitude of genes in concordantly transcribed gene sets in  
2 each sample. These sets provide a low-dimensional representation that reconstructs the signal of the input  
3 genomics data. Therefore, CoGAPS is a robust, compressed sensing algorithm for genomics. These relative  
4 magnitudes across samples are called patterns and quantify the separation of distinct experimental  
5 conditions. The gene sets are inferred simultaneously, and are continuous to quantify the relative magnitude  
6 of gene weights in each set. A single gene may have non-zero magnitude in several distinct gene sets,  
7 representing the fact that a single gene can have distinct roles in different biological processes (such as  
8 immediate therapeutic response and acquired resistance). A recently developed PatternMarker statistic [25]  
9 selects the genes that are unique to each of the inferred patterns, and therefore represent biomarkers unique  
0 to the corresponding biological process.

1 We identified five CoGAPS patterns in the time course gene expression dataset: three patterns that  
2 distinguished the experimental conditions (cetuximab vs. PBS) (**Fig. 2B** and **Fig. 2C** and **Supplemental Fig.**  
3 **5**); one pattern that represented changes in gene expression from the parental cell lines and subsequent  
4 generations; and one pattern that was constant and corresponded to signature of highly expressed genes  
5 (**Supplemental Fig. 2**). We applied the PatternMarker statistic to define genes that were uniquely associated  
6 with each of these patterns. We excluded the technical, flat pattern to focus with genes with expression  
7 changes. By design, genes selected with the PatternMarker statistic are selected to not be multiply regulated  
8 regulated. Therefore, limiting the heatmap to these genes enabled visualization of the dynamics of gene  
9 expression changes in our time-course dataset (**Fig. 2B**). The relative magnitude of CoGAPS pattern weights  
0 for each sample quantified the dynamics of gene expression changes (**Fig. 2C**).

1 Similar to the separation seen with clustering (**Supplemental Fig. 5**), the first CoGAPS expression pattern  
2 distinguished cetuximab from PBS at every generation (expression pattern 1, **Fig. 2B** and **Fig. 2C**, top).  
3 These genes had an immediate transcriptional induction in response to cetuximab treatment. Gene set  
4 analysis to determine the function of CoGAPS patterns was performed with an enrichment analysis on all  
5 gene weights obtained from the CoGAPS analysis. By performing the analysis on gene weights and not only  
6 the PatternMarker genes in **Fig. 2B**, we accounted for multiple regulation of genes in pathways. Gene set  
7 enrichment analysis on confirmed that published resistance signatures [37,39] were significantly enriched in  
8 this pattern (**Supplemental Fig. 6**; one-sided p-values of 0.002 and 0.003 for resistance gene sets  
9 COLDREN\_GEFITINIB\_RESISTANCE\_DN and HACAT\_HRAS\_CETUXIMAB\_RESISTANCE, respectively).  
0 However, the transcriptional changes in this pattern were not associated with acquired resistance to  
1 cetuximab, and even decreased modestly as resistance developed. Further, enrichment by transcription  
2 factor AP-2alpha targets (*TFAP2A*; one-sided p-value of 0.05) confirmed previous work indicating that  
3 transcription by AP-2alpha is induced as an early feedback response to EGFR inhibition [44]. Based upon  
4 these findings, we concluded that pattern 1 was associated with immediate response to cetuximab although it  
5 includes genes that were also associated with cetuximab resistance in previous studies.

6 The second CoGAPS expression pattern quantified divergence of the cetuximab treated cells from controls at  
7 generation CTX-G4 (expression pattern 2, **Fig. 2B** and **Fig. 2C**, middle) which was the time point that

8 cetuximab treated cells presented significant and stable growth advantage over PBS controls (**Fig. 1**).

9 Therefore, expression pattern 2 obtained gene expression signatures associated consistently with the

0 development of cetuximab resistance. Gene set statistics of transcription factor targets of EGFR on CoGAPS

1 gene weights were significantly down-regulated in this acquired resistance pattern (**Supplemental Fig. 6**).

2 One striking exception was c-Myc, which trended with acquired resistance (p-value of 0.06), consistent with

3 the role of this transcription factor in cellular growth. Resistance signature

4 COLDREN\_GEFITINIB\_RESISTANCE\_DN gene signature was significantly down-regulated in expression

5 pattern 2 (p-value of 0.04).

6 CoGAPS expression pattern 3 represented a gradual repression of gene expression with cetuximab

7 treatment (**Fig. 2B** and **Fig. 2C**, bottom). This expression pattern trended to significant enrichment in the

8 COLDREN\_GEFITINIB\_RESISTANCE\_DN resistance signature (**Supplemental Fig. 6**, one-sided p-value

9 0.12) and down-regulated in the HACAT\_HRAS\_CETUXIMAB\_RESISTANCE resistance signature

0 (**Supplemental Fig. 6**, one-sided p-value 0.09). This confirmed that expression pattern 3 was associated with

1 repression of gene expression during acquired cetuximab resistance.

2 Significant enrichment of the acquired resistance signature in CoGAPS expression patterns 1-3

3 (**Supplemental Fig. 6**) suggested that genes defined from case-control experimental designs of acquired

4 resistance provide a mixture of genes associated with early response to cetuximab and genes associated

5 with acquired resistance. In addition, the published resistance signatures [37,39] included genes that the

6 CoGAPS and PatternMarker analysis associated with immediate response to treatment (**Supplemental Fig**

7 **4**). Inclusion of immediate response genes from expression pattern 1 in the published resistance signatures

8 arose from the design of the experiments in the original publications [37,39]. Specifically, the resistance

9 signatures derived from data that was collected at a single time point when the cell models have already

0 developed resistance. At the same time point in our time-course data, gene expression changes included

1 both immediate response genes and longer-term expression changes due to acquired resistance. Therefore,

2 both sets of genes have significant expression changes in resistant cells when compared only to their

3 parental cell line. These immediate response genes cannot be eliminated without including any additional

4 samples at intermediate time points. This observation is consistent with recent studies demonstrating that

5 time-course proliferation data increases the accuracy in drug-response metrics by removing the confounding  
6 effects of variability in cell growth/division rates and treatment effects [45,46]. Thus, the gene expression  
7 signature in CoGAPS patterns from the time course were able to parse apart transcriptional changes specific  
8 to immediate therapeutic response from those specific to acquired resistance.

9 **Changes in DNA methylation inferred with CoGAPS were associated with resistance to cetuximab,**  
0 **but not the immediate response to treatment observed in gene expression**

1 To determine the timing of the methylation changes associated with acquired resistance, we also measured  
2 DNA methylation in each cetuximab generation of SCC25 cells and PBS controls (**Fig. 3A**). Application of the  
3 CoGAPS matrix factorization algorithm to the methylation data revealed a total of 3 patterns (**Fig. 3B and**  
4 **Fig. 3C**): gradual increase of DNA methylation in controls (DNA methylation pattern 1, middle); rapid  
5 demethylation in CTX generations starting at CTX-G4 (DNA methylation pattern 2, bottom); and rapid  
6 increase in DNA methylation in CTX generations starting at CTX-G4 (DNA methylation pattern 3, top). In  
7 contrast to the gene expression data, there was no immediate shift in DNA methylation resulting from  
8 cetuximab treatment.

9 Comparing the CoGAPS patterns from gene expression and DNA methylation revealed strong anti-  
0 correlation between gene expression and DNA methylation in resistant patterns (**Supplemental Fig. 7A**). We  
1 observed that the gene expression changes associated with acquired resistance occurred gradually and were  
2 evident in early generations (**Fig. 4**, top). The DNA methylation was consistent in cetuximab treatment and  
3 control PBS in DNA methylation patterns 2 and 3 during early generations. Then, rapid accumulation in DNA  
4 methylation changes started after generations CTX-G4 and CTX-G5 in both patterns 2 and 3 (**Fig. 4**, bottom),  
5 concurrent with the onset of the observed growth advantage over the PBS control (**Fig. 1**). Changes in DNA  
6 methylation were delayed relative to those of gene expression in acquired cetuximab resistance (**Fig. 4**,  
7 dashed vertical lines). These dynamics suggests that DNA methylation stabilized the gene expression  
8 signatures crucial to the maintenance of acquired cetuximab resistance.

9 **Epigenetic regulation of *FGFR1* expression was associated with acquired cetuximab resistance in the**  
0 **time course and in stable cetuximab resistant clones**



1 The gene signatures from the CoGAPS resistance patterns for expression and methylation had low  
2 correlation (**Supplemental Fig. 7B**) and there was little overlap between their respective PatternMarker  
3 genes. The low overlap between genes and their timing differences indicated that alterations to transcription  
4 were independent of DNA methylation. However, we hypothesized that the DNA methylation changes  
5 stabilized the resistant phenotype. Therefore, the CoGAPS gene signatures from each data modality were  
6 insufficient to define the functional DNA methylation regulation of acquired resistance. Nonetheless, we  
7 hypothesized that epigenetic regulation contributed to stabilizing the resistant phenotype. Characterizing the  
8 role of such epigenetic regulations is critical to understand the stable resistant phenotype. Moreover,  
9 identifying these epigenetic drivers can provide targets to overcome such stable resistance.

0 To ascertain potential drivers of the stable cetuximab resistant phenotype induced by DNA methylation, we  
1 defined genes that are PatternMarkers [25] of the DNA methylation patterns associated with stable acquired  
2 cetuximab resistance (methylation patterns 2 and 3). We then applied correlation analysis to determine genes  
3 that were epigenetically silenced. Specifically, we performed correlation analysis between DNA methylation  
4 and gene expression for each of the DNA methylation PatternMarker genes (**Fig. 5**). *FGFR1* was among  
5 these genes. This finding was consistent with previous studies that associate differential expression of  
6 *FGFR1* with resistance to EGFR inhibitors, including cetuximab, in different tumor types *in vitro* and *in vivo*  
7 [26–28]. Given the tight temporal regulation of these genes and the previous work on *FGFR1*, we  
8 hypothesized that this set of genes represented epigenetic drivers of acquired resistance.

9 To delineate whether our presumptive drivers resulted from clonal expansion of resistant cells or from the  
0 development of new epigenetic alterations to drive resistance, we measured DNA methylation and gene  
1 expression on a panel of eleven isogenic stable cetuximab resistant clones derived from SCC25 cells  
2 previously [30]. Briefly, SCC25 was continuously treated with cetuximab until resistance developed, and then  
3 single cell clones were isolated and profiled in the absence of cetuximab treatment. Despite being derived  
4 from parental SCC25 cells, the single cell clones and time course generations displayed widespread  
5 differences. Significantly greater heterogeneity was observed among the cetuximab resistant single-cell  
6 clones in both expression and methylation profiles (**Supplemental Fig. 8 and 9**, respectively) and cellular  
7 morphology (**Supplemental Fig. 10**). **Fig. 5A and 5B** demonstrate that higher heterogeneity among single

8 cell clones was also observed in the epigenetically regulated PatternMarker genes from the CoGAPS  
9 analysis that are shown in **Figure 4D**. These results suggest that different mechanisms of resistance may  
0 arise in the same HNSCC cell line.

1 We hypothesized that epigenetically regulated genes shared along the time course patterns and resistant  
2 single-cell clones may implicate common mechanisms acquired during evolution of the stable resistance  
3 phenotype. To test this hypothesis, we also performed correlation analysis for each of the epigenetically  
4 regulated genes in our resistant set (**Fig. 5**) in the resistant clones and parental cell lines. Nine of the  
5 epigenetically regulated PatternMarker genes also had significantly anti-correlated gene expression and DNA  
6 methylation in the stable cetuximab resistant clones (**Supplemental Fig. 11**). Of these, only *FGFR1* was  
7 demethylated and reexpressed in a cetuximab resistant clone relative to the parental SCC25 cell line (**Fig. 6**).  
8 In this analysis, epigenetic regulation of gene expression for *FGFR1* occurred in only one of the resistant  
9 clones (CTXR10). This clone was among the fastest growing under cetuximab treatment (**Supplemental Fig.**  
0 **12**). This observation suggested that the pooled data from the time course captured clonal outgrowth of a  
1 cetuximab resistant clone with similar molecular features (*FGFR1* demethylation) to CTXR10, and that  
2 therefore clonal outgrowth was the dominant mechanism of resistance in our resistance model.

### 3 ***FGFR1* observed dynamics *in vitro* recapitulates relationships from *in vivo* tumor genomics and** 4 **acquired cetuximab resistance**

5 In order to validate our *in vitro* findings, we further investigated the pattern of expression and methylation of  
6 *FGFR1* and *EGFR* in other publicly available datasets. Using gene expression and DNA methylation data  
7 from The Cancer Genome Atlas (TCGA) for 243 HPV-negative HNSCC pretreatment samples [33], we  
8 verified that the up-regulation of *EGFR* and *FGFR1* is not concomitant (Pearson correlation coefficient = -  
9 0.06, p value = 0.33, **Fig. 7A**). We found that *FGFR1* gene expression and DNA methylation status were  
0 significantly negatively correlated (Pearson correlation  $r$  of -0.32, p value < 0.0001, **Fig. 7B**), in TCGA  
1 samples, suggesting that *FGFR1* transcription was epigenetically regulated in a significant proportion of HPV-  
2 negative HNSCC tumors.

3 Bossi et al. [41] collected gene expression data from cetuximab-treated HNSCC patients with recurrent  
4 metastasis with either short- (SPFS, median 3 months survival) or long-progression-free survival (LPFS,  
5 median 19 months survival). Using this dataset, we verified that *EGFR* expression in SPFS is significantly  
6 lower than the LPSF group (**Fig. 7C**) (log fold change -1.0, t-test p-value 0.0003). The opposite was observed  
7 for *FGFR1*, with overexpression in SPFS vs. LPSF (**Fig. 7D**, log fold change 0.9, t-test p-value 0.003).  
8 However, Bossi et al.[41] lacked DNA methylation data to assess whether *FGFR1* was epigenetically  
9 regulated in these samples. Nonetheless, this finding in combination with the data from TCGA, supports our  
0 findings that the non-responder phenotype was accompanied by loss of *EGFR* expression and gain in  
1 *FGFR1* expression as a result of *FGFR1* promoter demethylation acquired during the development of  
2 cetuximab resistance.

3

#### 4 **DISCUSSION**

5 Numerous short time course genomics studies of therapeutic response have been performed [45,47,48], but  
6 this is the first time that genetic and epigenetic changes were measured for a prolonged exposure (11 weeks)  
7 to a targeted therapeutic agent. Using our novel robust time course experimental approach, we characterized  
8 the molecular alterations during the development of acquired cetuximab resistance in HNSCC *in vitro*. By  
9 collecting cells over experimentally equivalent cultures (cetuximab and PBS control generations), we could  
0 measure changes in proliferation and multiple genomics data platforms as resistance developed. We applied  
1 this approach to the intrinsic cetuximab sensitive cell line SCC25 to track the molecular progression in  
2 acquired cetuximab resistance. This cell line was selected as one of only two HNSCC cell lines known to  
3 develop an isogenic resistance cell line with acquired cetuximab resistance [10]. Thus, this was the first study  
4 to our knowledge to enable characterization of the dynamics at the early stages of therapeutic resistance,  
5 which cannot be measured in patients due to the complexity of early detection of resistance and obtaining  
6 repeat biopsy samples.

7 Determining the dynamics of the molecular alterations responsible for resistance requires integrated, time-  
8 course bioinformatics analysis to quantify the dynamics of these alterations. Based upon previous

9 performance of Bayesian, non-negative matrix factorization algorithms in inferring dynamic regulatory  
0 networks for targeted therapeutics [48,49], we selected CoGAPS [35] for analysis of gene expression data  
1 from our time course experiment. In this dataset, CoGAPS analysis of gene expression data from cetuximab  
2 resistant clones distinguished the patterns for immediate gene expression changes and patterns for long-term  
3 changes associated with acquired resistance. Gene expression signatures for resistance to EGFR inhibitors  
4 in two additional cell lines (one HNSCC and one non-small cell lung cancer) from previous studies [37,39]  
5 were significantly enriched in both types of CoGAPS patterns. These previous resistance signatures were  
6 learned from case-control studies that compared gene expression for sensitive cells to that of resistant cells,  
7 without multiple time point measurements. Therefore, we concluded that time course data was instrumental in  
8 parsing signatures of immediate therapeutic response from signatures of acquired resistance.

9 Pooling cells to obtain paired measure of methylation and gene expression enabled us to evaluate whether  
0 changes in DNA methylation impact gene expression. CoGAPS analysis of DNA methylation data observed  
1 only changes associated with acquired resistance, in contrast to the immediate expression changes observed  
2 with cetuximab treatment. Thus, while therapeutic response can drive massive changes in gene expression,  
3 only the subset of expression changes associated with the development of resistance have corresponding  
4 epigenetic signatures suggesting that epigenetic landscape was important for the creation of acquired  
5 resistance. The CoGAPS patterns in gene expression that were associated with acquired cetuximab  
6 resistance gradually changed over the time course. On the other hand, the CoGAPS patterns for DNA  
7 methylation changes had a sharp transition at the generation at which resistance was acquired (CTX-G4).  
8 These patterns reflect a delayed, but more rapid change in DNA methylation. Our data is consistent with  
9 previous observations that gene expression changes precede DNA methylation alterations in genes critical  
0 for cancer progression. *P16<sup>INK4A</sup>* and *GSTP1* are tumor suppressor genes for which transcription silencing  
1 was found to occur prior to DNA hypermethylation and chromatin changes. The temporal delay observed  
2 between expression and methylation patterns in our time course provides transcriptome wide evidence of this  
3 phenomena. Specifically, that epigenetic changes are necessary to stabilize gene expression aberrant profile  
4 and will be followed by modification into a silenced methylation state that will result in tumor progression  
5 [50,51]. Our integrated RNA-seq and DNA methylation analysis corroborated the fact that gene expression

6 changes occur earlier to epigenetic alterations and suggest that in acquired cetuximab resistance to  
7 cetuximab DNA methylation is essential to maintain the changes in gene expression. Future investigation into  
8 the chromatin remodeling mechanisms will test whether chromatin alterations follow the changes in  
9 expression and occur in combination with altered methylation patterns to drive epigenetic regulation of  
0 resistance.

1 In a recent study, gene expression changes are associated with a transient resistant phenotype present in  
2 melanoma cell lines prior to vemurafenib administration [52]. Once the melanoma cells are exposed to the  
3 drug, additional changes in gene expression are detected and are later accompanied by changes in  
4 chromatin structure [52]. These findings, together with our time course observations, suggest that in the  
5 heterogeneous tumor environment the existence of some cells expressing specific marker genes can trigger  
6 cellular reprogramming as soon as the targeted therapy is initiated. Upon drug administration, the number of  
7 genes with aberrant expression increases, and is followed by other epigenetic and genetic changes that will  
8 shift the transient resistant state into a stable phenotype. This finding on acquired resistance development  
9 could dramatically change the course of treatment with targeted therapeutic agents. The precise  
0 characterization of resistant gene signatures and their timing could be used to determine the correct point  
1 during the patients' clinical evolution to introduce alternative therapeutic strategies. This way, secondary  
2 interventions would start before the stable resistant phenotype is spread among the tumor cells resulting in  
3 prolonged disease control and substantial increased in overall survival.

4 The timing delays between alterations in DNA methylation and gene expression pose a further computational  
5 challenge for integrated, time course genomics analyses. The vast majority of integrated analysis algorithms  
6 assume one-to-one mapping of genes in different data platforms or seek common patterns or latent variables  
7 across them [53]. Such approaches would fail to capture the early changes from cetuximab treatment that  
8 impact only gene expression, time delays between DNA methylation and gene expression patterns, and  
9 different gene usage in each pattern. It is essential to develop new integrated algorithms to simultaneously  
0 distinguish both patterns that are shared across data types and that are unique to each platform. For time  
1 course data, these algorithms must also model regulatory relationships that may give rise to timing delays,  
2 such as epigenetic silencing of gene expression. However, as we observed with the unanticipated changes in

3 DNA methylation following and not preceding gene expression, they must also consider delays resulting from  
4 larger phenotypic changes such as the stability of the therapeutic resistant phenotype.

5 In spite of the complexities of the data integration, the weight of each sample in patterns inferred by CoGAPS  
6 reflected the dynamics of the process in each data modality. These patterns were learned completely  
7 unsupervised from the data, and did not require any gene selection or comparison between time points  
8 relative to any reference control. This analysis demonstrates that applying matrix factorization algorithms for  
9 compresses sensing in genomics can reconstruct signals associated with phenotypes from time course,  
0 omics data. The genes associated with CoGAPS patterns had weights that were non-zero in multiple  
1 patterns. The PatternMarker [25] statistic enabled further selection of the genes that were uniquely  
2 associated with each pattern. Creating a heatmap of the genomics profiles for these genes enabled novel,  
3 heatmap-based visualization of the temporal dynamics in the omics data. In the case of DNA methylation,  
4 these pattern marker genes also included genes representing driver alterations in resistance. However,  
5 transcriptional regulation by epigenetic alterations or in pathways involves simultaneous co-regulation of  
6 multiple genes. This co-regulation was reflected in the reuse of genes in CoGAPS gene weights associated in  
7 each pattern. Therefore, estimates of pathway dynamics from transcriptional data required accounting for all  
8 genes with gene set enrichment statistics instead of the PatternMarker statistic. Thus, we hypothesize that  
9 the PatternMarker statistic is robust for visualization, biomarker identification, and functional alterations in  
0 DNA over time, whereas it is robust only for visualization of and biomarker selection from time-course  
1 transcriptional data.

2 Among the genes we observed with the canonical relationship between expression and methylation, *FGFR1*  
3 presented with loss of CpG methylation accompanied by increased gene expression. *FGFR1* is a receptor  
4 tyrosine kinase that regulates downstream pathways, such as PI3K/AKT, and RAS/MAPK, that are also  
5 regulated by *EGFR* [54]. Its overexpression has been previously associated with EGFR inhibitors resistance  
6 [26–28]. To our knowledge this is the first study showing epigenetic regulation of *FGFR1* in HNSCC and the  
7 association of that epigenetic regulation with acquired cetuximab resistance. In this case, *FGFR1* induction  
8 through promoter demethylation in concordance with down regulation of *EGFR* appears to be the dominant  
9 mechanism. The novel cell culture protocol and time course analysis we developed here is what enabled us

0 to see the clonal outgrowth of this particular mechanism. These results are also relevant for further  
1 translational studies into the role of *FGFR1* as a potential biomarker of acquired cetuximab resistance and  
2 potential target to overcome that resistance. *FGFR1* is a potential target for combined targeted therapy with  
3 *EGFR*, and inhibitors against this target are already the focus of clinical trials [54].

4 The main limitation of the current study was the use of a single cell line model to induce resistance and  
5 collect the time course data for gene expression and epigenetics analysis. SCC25 is intrinsically sensitive to  
6 cetuximab and one of the only two available models in HNSCC that are known to acquire resistance to  
7 cetuximab from long term exposure [9]. From a single cell line model, we generated two groups of samples  
8 (CTX and PBS generations) over the course of 11 weeks. High throughput measurements and analysis were  
9 performed for a total of 22 samples. The collection of multiple data points in the analysis had to be accounted  
0 for when determining the number of cell models to be included. We nonetheless compare our data to gene  
1 signatures from the other isogenic HNSCC resistance model 1CC8 [10] and an independent resistance  
2 model to an EGFR inhibitor in non-small cell lung cancer [39]. Besides the number of samples, we also had  
3 to take into consideration the potential batch and technical effects of broad cross-platform profiling.  
4 Nevertheless, the analysis of HNSCC patient samples from TCGA [33] and another study [41] validated our  
5 finding that *FGFR1* is up-regulated and demethylated in HNSCC and associated with resistance to  
6 cetuximab.

7 The *in vitro* protocol for time course sampling developed in this study has the additional advantage of  
8 aggregating potentially heterogeneous mechanisms of resistance increasing the signal of changes in any  
9 cetuximab resistant subclone. For example, we observed epigenetic regulation of *FGFR1* in the pooled cells,  
0 but only a single stable clone generated from the same SCC25 cell line in a previous study (CTXR10) had  
1 upregulation of *FGFR1* [30]. This finding suggests that tumor heterogeneity also plays a role in acquired  
2 resistance to target therapies and enables different pathways to be used to bypass the silenced target within  
3 the same tumor. The heterogeneity in methylation profiles reflected the complexity of the resistance  
4 mechanisms that can arise from combination therapies in heterogeneous tumors. Future work extending  
5 these protocols to *in vivo* models is essential to determine the role of the microenvironment in inducing  
6 therapeutic resistance. Developing *in vivo* models with acquired therapeutic resistance presents numerous

7 technical challenges that must first be addressed before such time course sampling is possible [9].  
8 Pinpointing precise molecular predictors of therapeutic resistance will facilitate the identification of  
9 unprecedented biomarkers and reveal the mechanisms by which to overcome acquired therapeutic  
0 resistance to most therapies used to treat cancer.

1

## 2 **CONCLUSIONS**

3 By developing a new experimental protocol and using robust bioinformatics tools, we measured the changes  
4 in gene expression and DNA methylation during the progression from an intrinsic responsive state to  
5 cetuximab to the acquired resistant phenotype. Using the CoGAPS matrix factorization algorithm, we  
6 observed massive changes in gene expression and identified and discriminated the different patterns  
7 associated with resistance or cell culturing conditions. This analysis demonstrates that compressed sensing  
8 matrix factorization algorithms can identify gene signatures associated with the dynamics of phenotypic  
9 changes from time-course, genomics data. In this case, the gene expression patterns relevant to resistance  
0 were later followed by epigenetic alterations. Our main conclusion is that the resistant phenotype is driven by  
1 gene expression changes that would confer the cancer cells adaptive advantages to the treatment with  
2 cetuximab. Finally, the stability of the resistant state is dependent on epigenetic changes that will make these  
3 new gene signatures heritable to expand the phenotype to the daughter cells. This finding is significant to  
4 clinical practice, since it suggests the resistant phenotype could be reversed if alternative interventions are  
5 used in combination from the beginning or introduced before epigenetic alterations to the genes driving  
6 acquired resistance.

7

## 8 **List of abbreviations**

9 AKT – AKT serine/threonine kinase  
0 ATCC – American Type Culture Collection  
1 CoGAPS – Coordinated Gene Activity in Pattern Sets  
2 CTX - cetuximab  
3 CTXR – single cell cetuximab resistant clone  
4 DNA – deoxyribonucleic acid



5 EGFR – Endogenous Growth Factor Receptor  
6 FDA – Food and Drug Administration  
7 FGFR1 – Fibroblast Growth Factor Receptor 1  
8 GEO – Gene Expression Omnibus  
9 GSTP1 – Glutathione S-Transferase pi 1  
0 GWCoGAPS – Genome Wide Coordinated Gene Activity in Pattern Sets  
1 HNSCC – Head and neck squamous cell carcinoma  
2 HRAS – HRAS proto-oncogene  
3 JHMI – Johns Hopkins Medical Institutions  
4 LPFS – Long-progression-free survival  
5 MAPK – Mitogen activated kinase-like protein  
6 PBS – Phosphate buffered saline  
7 PI3K – Phosphoinositide-3-kinase regulatory subunit 1  
8 RIN – RNA integrity number  
9 RNA – Ribonucleic acid  
0 RNA-seq – Ribonucleic acid sequencing  
1 rRNA – Ribosomal ribonucleic acid  
2 SNP – Single nucleotide polymorphism  
3 SPFS – Short-progression-free survival  
4 STR – Short tandem repeat  
5 TCGA – The Cancer Genome Atlas  
6 TFAP2A – Transcription factor AP-2 alpha

## 7 **Acknowledgements**

8 We thank JHMI Deep Sequencing & Microarray Core and SKCCC Microarray Core Facility on performing and  
9 providing advice on RNA-Seq and DNA methylation hybridization arrays, respectively; S. Boca, B. Kerr, S.  
0 Floor, C. Mak, T. Ou, D. Sidransky, L. M. Weiner, F. Zamuner, K. Zambo, and members of NewPISlack for  
1 critical comments and feedback during the preparation of the manuscript.

## 2 **DECLARATIONS**

### 3 **Funding**

4 This work was supported by NIH Grants R01CA177669, R21DE025398, P30 CA006973. R01 DE017982,  
5 and SPORE P50DE019032.

### 6 **Competing interests**

7 None of the authors have competing interests to declare.

### 8 **Author contributions**

9 G.S., L.T.K, S.L., C.H.C. and E.J.F. planned, designed and wrote the manuscript with input from all authors.  
0 G.S., L.T.K., S.L., M.T., C.H.C. and E.J.F. contributed to the development of methodology. G.S., S.L. and  
1 E.J.F. performed analysis and interpretation of data (e.g., computational analysis). R.R., H.O., H.C., M.C.,  
2 A.F., L.V.D., J.A., D.A.G. participated in development of methodology and provided technical and material  
3 support. R.R., L.V.D., E.I. and D.A.G. participated in review, and/or revision of the manuscript. All authors  
4 discussed the data and contributed to the manuscript preparation. C.H.C. and E.J.F. instigated and  
5 supervised the project.

## 6 References

- 7 1. Sawyers C. Targeted cancer therapy. *Nature*. 2004;432:294–7.
- 8 2. Hyman DM, Taylor BS, Baselga J. Implementing Genome-Driven Oncology. *Cell*. 2017;168:584–99.
- 9 3. Hata AN, Niederst MJ, Archibald HL, Gomez-Caraballo M, Siddiqui FM, Mulvey HE, et al. Tumor cells  
0 can follow distinct evolutionary paths to become resistant to epidermal growth factor receptor  
1 inhibition. *Nat. Med.* 2016;22:262–9.
- 2 4. Engelman JA, Zejnullahu K, Mitsudomi T, Song Y, Hyland C, Park JO, et al. MET Amplification Leads to  
3 Gefitinib Resistance in Lung Cancer by Activating ERBB3 Signaling. *Science*. 2007;316:1039–43.
- 4 5. Misale S, Yaeger R, Hobor S, Scala E, Janakiraman M, Liska D, et al. Emergence of KRAS mutations and  
5 acquired resistance to anti-EGFR therapy in colorectal cancer. *Nature*. 2012;486:532–6.
- 6 6. Pietrantonio F, Vernieri C, Siravegna G, Mennitto A, Berenato R, Perrone F, et al. Heterogeneity of  
7 Acquired Resistance to Anti-EGFR Monoclonal Antibodies in Patients with Metastatic Colorectal Cancer.  
8 *Clin. Cancer Res.* 2017;23:2414–22.
- 9 7. Vincenzi B, Zoccoli A, Pantano F, Venditti O, Galluzzo S. Cetuximab: from bench to bedside. *Curr.*  
0 *Cancer Drug Targets*. 2010;10:80–95.
- 1 8. Boeckx C, Weyn C, Vanden Bempt I, Deschoolmeester V, Wouters A, Specenier P, et al. Mutation  
2 analysis of genes in the EGFR pathway in Head and Neck cancer patients: implications for anti-EGFR  
3 treatment response. *BMC Res. Notes*. 2014;7:337.
- 4 9. Quesnelle KM, Wheeler SE, Ratay MK, Grandis JR. Preclinical modeling of EGFR inhibitor resistance in  
5 head and neck cancer. *Cancer Biol. Ther.* 2012;13:935–45.
- 6 10. Wheeler DL, Huang S, Kruser TJ, Nechrebecki MM, Armstrong EA, Benavente S, et al. Mechanisms of  
7 acquired resistance to cetuximab: role of HER (ErbB) family members. *Oncogene*. 2008;27:3944–56.
- 8 11. Narayan M, Wilken JA, Harris LN, Baron AT, Kimbler KD, Maihle NJ. Trastuzumab-Induced HER  
9 Reprogramming in “Resistant” Breast Carcinoma Cells. *Cancer Res.* 2009;69:2191–4.
- 0 12. Ernst J, Nau GJ, Bar-Joseph Z. Clustering short time series gene expression data. *Bioinforma. Oxf.*  
1 *Engl.* 2005;21 Suppl 1:i159-168.
- 2 13. Aryee MJ, Gutiérrez-Pabello JA, Kramnik I, Maiti T, Quackenbush J. An improved empirical bayes  
3 approach to estimating differential gene expression in microarray time-course data: BETR (Bayesian  
4 Estimation of Temporal Regulation). *BMC Bioinformatics*. 2009;10:409.
- 5 14. Smyth GK. Linear models and empirical bayes methods for assessing differential expression in  
6 microarray experiments. *Stat. Appl. Genet. Mol. Biol.* 2004;3:Article3.
- 7 15. Lin D, Shkedy Z, Yekutieli D, Burzykowski T, Göhlmann HWH, De Bondt A, et al. Testing for trends in  
8 dose-response microarray experiments: a comparison of several testing procedures, multiplicity and  
9 resampling-based inference. *Stat. Appl. Genet. Mol. Biol.* 2007;6:Article26.
- 0 16. Fernández MA, Rueda C, Peddada SD. Identification of a core set of signature cell cycle genes whose  
1 relative order of time to peak expression is conserved across species. *Nucleic Acids Res.* 2012;40:2823–  
2 32.

- 3 17. Ernst J, Vainas O, Harbison CT, Simon I, Bar-Joseph Z. Reconstructing dynamic regulatory maps. *Mol.*  
4 *Syst. Biol.* 2007;3:74.
- 5 18. Bonneau R, Reiss DJ, Shannon P, Facciotti M, Hood L, Baliga NS, et al. The Inferelator: an algorithm  
6 for learning parsimonious regulatory networks from systems-biology data sets de novo. *Genome Biol.*  
7 2006;7:R36.
- 8 19. Liao JC, Boscolo R, Yang Y-L, Tran LM, Sabatti C, Roychowdhury VP. Network component analysis:  
9 reconstruction of regulatory signals in biological systems. *Proc. Natl. Acad. Sci. U. S. A.* 2003;100:15522-  
0 7.
- 1 20. Seok J, Xiao W, Moldawer LL, Davis RW, Covert MW. A dynamic network of transcription in LPS-  
2 treated human subjects. *BMC Syst. Biol.* 2009;3:78.
- 3 21. Naegle KM, Welsch RE, Yaffe MB, White FM, Lauffenburger DA. MCAM: multiple clustering analysis  
4 methodology for deriving hypotheses and insights from high-throughput proteomic datasets. *PLoS*  
5 *Comput. Biol.* 2011;7:e1002119.
- 6 22. Wise A, Bar-Joseph Z. SMARTS: reconstructing disease response networks from multiple individuals  
7 using time series gene expression data. *Bioinformatics.* 2015;31:1250-7.
- 8 23. Ochs MF, Fertig EJ. Matrix factorization for transcriptional regulatory network inference. *IEEE Symp*  
9 *Comput Intell Bioinforma Comput Biol Proc [Internet].* 2012. p. 387-96. Available from:  
0 [http://ieeexplore.ieee.org/xpls/abs\\_all.jsp?arnumber=6217256](http://ieeexplore.ieee.org/xpls/abs_all.jsp?arnumber=6217256)
- 1 24. Ogawa T, Liggett TE, Melnikov AA, Monitto CL, Kusuke D, Shiga K, et al. Methylation of death-  
2 associated protein kinase is associated with cetuximab and erlotinib resistance. *Cell Cycle Georget. Tex.*  
3 2012;11:1656-63.
- 4 25. Stein-O'Brien G, Carey J, Lee W, Considine M, Favorov A, Flam E, et al. PatternMarkers and Genome-  
5 Wide CoGAPS Analysis in Parallel Sets (GWCoGAPS) for data-driven detection of novel biomarkers via  
6 whole transcriptome Non-negative matrix factorization (NMF). *bioRxiv.* 2016;83717.
- 7 26. Azuma K, Kawahara A, Sonoda K, Nakashima K, Tashiro K, Watari K, et al. FGFR1 activation is an  
8 escape mechanism in human lung cancer cells resistant to afatinib, a pan-EGFR family kinase inhibitor.  
9 *Oncotarget.* 2014;5:5908-19.
- 0 27. Bertotti A, Papp E, Jones S, Adleff V, Anagnostou V, Lupo B, et al. The genomic landscape of response  
1 to EGFR blockade in colorectal cancer. *Nature.* 2015;526:263-7.
- 2 28. Koole K, Brunen D, van Kempen PMW, Noorlag R, de Bree R, Lieftink C, et al. FGFR1 Is a Potential  
3 Prognostic Biomarker and Therapeutic Target in Head and Neck Squamous Cell Carcinoma. *Clin. Cancer*  
4 *Res. Off. J. Am. Assoc. Cancer Res.* 2016;22:3884-93.
- 5 29. Hatakeyama H, Cheng H, Wirth P, Counsell A, Marcrom SR, Wood CB, et al. Regulation of heparin-  
6 binding EGF-like growth factor by miR-212 and acquired cetuximab-resistance in head and neck  
7 squamous cell carcinoma. *PloS One.* 2010;5:e12702.
- 8 30. Cheng H, Fertig EJ, Ozawa H, Hatakeyama H, Howard JD, Perez J, et al. Decreased SMAD4 expression  
9 is associated with induction of epithelial-to-mesenchymal transition and cetuximab resistance in head  
0 and neck squamous cell carcinoma. *Cancer Biol. Ther.* 2015;16:1252-8.

- 1 31. Wang K, Singh D, Zeng Z, Coleman SJ, Huang Y, Savich GL, et al. MapSplice: Accurate mapping of RNA-  
2 seq reads for splice junction discovery. *Nucleic Acids Res.* 2010;38:e178–e178.
- 3 32. Li B, Dewey CN. RSEM: accurate transcript quantification from RNA-Seq data with or without a  
4 reference genome. *BMC Bioinformatics.* 2011;12:323.
- 5 33. Lawrence MS, Sougnez C, Lichtenstein L, Cibulskis K, Lander E, Gabriel SB, et al. Comprehensive  
6 genomic characterization of head and neck squamous cell carcinomas. *Nature.* 2015;517:576–82.
- 7 34. Fortin J-P, Labbe A, Lemire M, Zanke BW, Hudson TJ, Fertig EJ, et al. Functional normalization of  
8 450k methylation array data improves replication in large cancer studies. *Genome Biol.* [Internet]. 2014  
9 [cited 2017 Feb 27];15. Available from:  
0 <http://genomebiology.biomedcentral.com/articles/10.1186/s13059-014-0503-2>
- 1 35. Fertig EJ, Ding J, Favorov AV, Parmigiani G, Ochs MF. CoGAPS: an R/C++ package to identify patterns  
2 and biological process activity in transcriptomic data. 2010; Available from:  
3 <http://bioinformatics.oxfordjournals.org/content/26/21/2792.short>
- 4 36. Bidaut G. Interpreting and Comparing Clustering Experiments Through Graph Visualization and  
5 Ontology Statistical Enrichment with the ClutrFree Package. *link.springer.com* [Internet]. Boston, MA:  
6 Springer US; 2010. p. 315–33. Available from: [http://www.springerlink.com/index/10.1007/978-1-4419-5714-6\\_19](http://www.springerlink.com/index/10.1007/978-1-4419-5714-6_19)
- 8 37. Fertig EJ, Ren Q, Cheng H, Hatakeyama H, Dicker AP, Rodeck U, et al. Gene expression signatures  
9 modulated by epidermal growth factor receptor activation and their relationship to cetuximab  
0 resistance in head and neck squamous cell carcinoma. *BMC Genomics.* 2012;13:160.
- 1 38. Subramanian A, Tamayo P, Mootha VK, Mukherjee S, Ebert BL, Gillette MA, et al. Gene set enrichment  
2 analysis: a knowledge-based approach for interpreting genome-wide expression profiles. *Proc. Natl.*  
3 *Acad. Sci. U. S. A.* 2005;102:15545–50.
- 4 39. Coldren CD. Baseline Gene Expression Predicts Sensitivity to Gefitinib in Non-Small Cell Lung Cancer  
5 Cell Lines. *Mol. Cancer Res.* 2006;4:521–8.
- 6 40. Matys V, Fricke E, Geffers R, Gössling E, Haubrock M, Hehl R, et al. TRANSFAC: transcriptional  
7 regulation, from patterns to profiles. *Nucleic Acids Res.* 2003;31:374–8.
- 8 41. Bossi P, Bergamini C, Siano M, Cossu Rocca M, Sponghini AP, Favales F, et al. Functional Genomics  
9 Uncover the Biology behind the Responsiveness of Head and Neck Squamous Cell Cancer Patients to  
0 Cetuximab. *Clin. Cancer Res. Off. J. Am. Assoc. Cancer Res.* 2016;22:3961–70.
- 1 42. Fertig EJ, Ozawa H, Thakar M, Howard JD, Kagohara LT, Krigsfeld G, et al. CoGAPS matrix  
2 factorization algorithm identifies transcriptional changes in AP-2alpha target genes in feedback from  
3 therapeutic inhibition of the EGFR network. *Oncotarget* [Internet]. 2016;5. Available from:  
4 <http://www.impactjournals.com/oncotarget/index.php?journal=oncotarget&page=article&op=view&path%5B%5D=12075&path%5B%5D=38216>
- 6 43. Fertig EJ, Ren Q, Cheng H, Hatakeyama H, Dicker AP, Rodeck U, et al. Gene expression signatures  
7 modulated by epidermal growth factor receptor activation and their relationship to cetuximab  
8 resistance in head and neck squamous cell carcinoma. *BMC Genomics.* 2012;13:160.

- 9 44. Fertig EJ, Ozawa H, Thakar M, Howard JD, Kagohara LT, Kringsfeld G, et al. CoGAPS matrix  
0 factorization algorithm identifies transcriptional changes in AP-2alpha target genes in feedback from  
1 therapeutic inhibition of the EGFR network. *Oncotarget*. 2016;7:73845–64.
- 2 45. Hafner M, Niepel M, Chung M, Sorger PK. Growth rate inhibition metrics correct for confounders in  
3 measuring sensitivity to cancer drugs. *Nat. Methods*. 2016;13:521–7.
- 4 46. Harris LA, Frick PL, Garbett SP, Hardeman KN, Paudel BB, Lopez CF, et al. An unbiased metric of  
5 antiproliferative drug effect in vitro. *Nat. Methods*. 2016;13:497–500.
- 6 47. Michna A, Schötz U, Selmansberger M, Zitzelsberger H, Lauber K, Unger K, et al. Transcriptomic  
7 analyses of the radiation response in head and neck squamous cell carcinoma subclones with different  
8 radiation sensitivity: time-course gene expression profiles and gene association networks. *Radiat.*  
9 *Oncol.* [Internet]. 2016 [cited 2017 Mar 26];11. Available from: [http://ro-](http://ro-journal.biomedcentral.com/articles/10.1186/s13014-016-0672-0)  
0 [journal.biomedcentral.com/articles/10.1186/s13014-016-0672-0](http://ro-journal.biomedcentral.com/articles/10.1186/s13014-016-0672-0)
- 1 48. Ochs MF, Rink L, Tarn C, Mburu S, Taguchi T, Eisenberg B, et al. Detection of Treatment-Induced  
2 Changes in Signaling Pathways in Gastrointestinal Stromal Tumors Using Transcriptomic Data. *Cancer*  
3 *Res*. 2009;69:9125–32.
- 4 49. Hill SM, Heiser LM, Cokelaer T, Unger M, Nesser NK, Carlin DE, et al. Inferring causal molecular  
5 networks: empirical assessment through a community-based effort. *Nat. Methods*. 2016;13:310–8.
- 6 50. Bachman KE, Park BH, Rhee I, Rajagopalan H, Herman JG, Baylin SB, et al. Histone modifications and  
7 silencing prior to DNA methylation of a tumor suppressor gene. *Cancer Cell*. 2003;3:89–95.
- 8 51. Stirzaker C, Song JZ, Davidson B, Clark SJ. Transcriptional gene silencing promotes DNA  
9 hypermethylation through a sequential change in chromatin modifications in cancer cells. *Cancer Res*.  
0 2004;64:3871–7.
- 1 52. Shaffer SM, Dunagin MC, Torborg SR, Torre EA, Emert B, Krepler C, et al. Rare cell variability and  
2 drug-induced reprogramming as a mode of cancer drug resistance. *Nature*. 2017;546:431–5.
- 3 53. Tyekucheva S, Marchionni L, Karchin R, Parmigiani G. Integrating diverse genomic data using gene  
4 sets. *Genome Biol*. 2011;12:R105.
- 5 54. Babina IS, Turner NC. Advances and challenges in targeting FGFR signalling in cancer. *Nat. Rev.*  
6 *Cancer*. 2017;
- 7  
8

## 9 FIGURES LEGENDS

0 **Figure 1 – *In vitro* time course reflects clinical evolution of cetuximab response and**  
1 **evolution of acquired resistance.** Intrinsic cetuximab sensitive HNSCC cell line SCC25 was  
2 treated with cetuximab (red) or PBS (black) for 11 generations to develop acquired resistance.  
3 Proliferation assay (flow) of cetuximab treatment (red line) and PBS treated cells (black line)  
4 measured cetuximab response for all SCC25 generations (bottom). Treatment response was

5 divided into three stages based upon the measured proliferation rates and clinical stages (top).  
6 While proliferation of the PBS generations was stable throughout the eleven weeks, proliferation of  
7 the CTX generations progressively increased over each week. Relative to the untreated controls,  
8 the growth of the treated cells was initially (CTX-G1) inhibited until CTX-G3. Starting at CTX-G4, the  
9 cells became resistant to the anti-proliferative effects of cetuximab and gained stable growth  
0 advantages compared to the untreated controls.

1 **Figure 2 – CoGAPS analysis identifies signatures of resistance to EGFR inhibitors and**  
2 **separate resistant and control generations. (A)** Heatmap of gene expression values in 11  
3 generations of SCC25 cells treated with 100nM of cetuximab (red columns) to acquire resistance  
4 and with PBS as control (black columns). **(B)** Heatmap of gene expression values for PatternMarker  
5 genes identified with CoGAPS analysis of gene expression data from 11 generations of SCC25 cells  
6 treated with PBS as control (black columns) and with 100nM of cetuximab (red columns) to acquire  
7 resistance. Rows are colored according to which CoGAPS pattern the PatternMarker statistic  
8 assigned each gene, and sorted by the PatternMarker statistic. **(C)** CoGAPS patterns inferred from  
9 gene expression data over generations of PBS control (black lines) or treatment with 100nM of  
0 cetuximab (red lines).

1 **Figure 3 – Dynamics of DNA methylation alterations and association with gene expression**  
2 **patterns in acquired cetuximab resistance. (A)** Heatmap of DNA methylation values in 11  
3 generations of SCC25 cells treated with PBS as control (black columns) and with 100nM of  
4 cetuximab (red columns) to acquire resistance. **(B)** Heatmap of DNA methylation values for genes  
5 selected by CoGAPS DNA methylation patterns analysis in the same SCC25 cetuximab and PBS  
6 generations. **(C)** CoGAPS patterns inferred from DNA methylation data over generations of PBS  
7 control (black lines) or treatment with 100nM of cetuximab (red lines).

8 **Figure 4 – DNA methylation and expression CoGAPS patterns demonstrate delayed onset of**  
9 **epigenetic changes in acquired resistance.** CoGAPS patterns for gene expression (top) and DNA  
0 methylation (bottom) of patterns associated with acquired cetuximab resistance in SCC25  
1 cetuximab generations (red) relative to PBS generations (black). Vertical dashed line represents  
2 time at which patterns for SCC25 generation separated from pattern for PBS generations. The  
3 timing of methylation changes distinguishing cetuximab resistant generations was delayed in DNA  
4 methylation relative to that of gene expression.

5 **Figure 5 – Clonal heterogeneity does not reflect signature of epigenetically regulated genes**  
6 **observed in bulk time-course analysis. (A)** Heatmap of gene expression values for DNA

7 methylation PatternMarker genes for acquired resistance that were anti-correlated between  
8 expression and DNA methylation (**Fig. 4D**). Data includes 11 generations of SCC25 cells treated  
9 with PBS as control (black columns labeled PBS) and with 100nM of cetuximab (red columns  
0 labeled cetuximab) to acquire resistance and gene expression data from independent, stable  
1 cetuximab resistant clones in absence of cetuximab treatment (CTX resistant clones). Gene  
2 expression heatmap on a red-yellow scale indicated in the color key. **(B)** Heatmap of DNA  
3 methylation data in conditions described in (a), on a blue-yellow scale indicated in the color key.

4 **Figure 6 – Epigenetic regulation of *FGFR1* in acquired cetuximab resistance is validated in**  
5 **stable SCC25 resistant clones. (A)** Expression of *FGFR1* gene expression relative to DNA  
6 methylation in stable cetuximab resistant clones. **(B)** QRT-PCR of *FGFR1* gene expression in  
7 CTXR10 relative to the parental cell line (greater than 30 fold change). **(C)** Western blot comparing  
8 *FGFR1*, phospho-*FGFR1*, *EGFR*, and phospho-*EGFR* in CTXR10 relative to the parental SCC25  
9 cell line. In the resistant cell clone, increased levels of *FGFR1* were associated with increased levels  
0 of phospho-*FGFR1* and decrease in *EGFR* and phospho-*EGFR*.

1 **Figure 7 – *FGFR1* gene expression and DNA methylation patterns were confirmed in**  
2 **independent HNSCC tumor samples datasets. (A)** Scatter plot of gene expression for *EGFR* and  
3 *FGFR1* in HPV-negative HNSCC samples from TCGA demonstrated that only a few HNSCC cases  
4 present increased levels of both genes and that there is no significant correlation between the  
5 expression of both genes concomitantly. **(B)** DNA methylation of *FGFR1* was anti-correlated with  
6 *FGFR1* expression in HPV-negative HNSCC TCGA samples, suggesting that up-regulation of  
7 *FGFR1* might be a result of promoter hypomethylation in primary tumors. **(C)** *EGFR* expression was  
8 significantly overexpressed in a group of HNSCC patients with long progression free survival relative  
9 to patients with short progression free survival in gene expression data from Bossi et al. **(D)** *FGFR1*  
0 was significantly overexpressed in patients with short progression free survival relative to patients  
1 with long progression free survival in this same dataset.

2

### 3 **Supplementary Figures Captions**

4 **Supplemental Figure 1 – Time course approach to induce resistance to cetuximab and**  
5 **measure gene expression and DNA methylation changes.** Intrinsic cetuximab sensitive HNSCC  
6 cell line SCC25 were treated with cetuximab (red) or PBS (black) for 7 days. In the eighth day, cells



7 were collected and pooled from multiple replicate cultures to provide adequate amounts for total  
8 RNA isolation for RNA-seq, genomic DNA isolation for DNA methylation array, proliferation assay  
9 (flow), for storage (frozen) and to be plated again to continue treatment until resistance to cetuximab  
0 developed. Each collection point was called a generation (from CTX-G0 to CTX-G11).

1 **Supplemental Figure 2** – Colony formation assay in matrigel for anchorage-independent growth  
2 confirmed acquired cetuximab resistance of CTX-G10 (red) relative to the parental cell line (CTX-  
3 G0, black) at different concentrations of cetuximab (0nM, 10nM, 100nM and 1000nM).

4 **Supplemental Figure 3** – Heatmap and hierarchical clustering of gene expression values in 11  
5 generations of SCC25 cells treated with PBS as control (black columns) and with 100nM of  
6 cetuximab (red columns) to acquire resistance.

7 **Supplemental Figure 4 – A.** Heatmap of gene expression values in 11 generations of SCC25 cells  
8 treated with 100nM of cetuximab (red columns) to acquire resistance and with PBS as control (black  
9 columns). Genes selected for visualization were associated with cetuximab resistance from previous  
0 gene expression studies comparing sensitive and resistant cells without regard for timing. These  
1 studies provided three gene sets, colored along rows of the heatmap. **B.** Average of z-score gene  
2 expression values for genes in each of the resistance signatures over generations of PBS control  
3 (black lines) or treatment with 100nM of cetuximab (red lines).

4 **Supplemental Figure 5** – Expected gene expression values for genes in each CoGAPS pattern  
5 inferred from gene expression data over generations of PBS control (black lines) or treatment with  
6 100nM of cetuximab (red lines). Patterns included a pattern reflecting technical artifacts between  
7 untreated controls at time 0 and subsequent generations (pattern 4) and a flat pattern for highly  
8 expressed genes (pattern 5), excluded from analysis in main figures. Heatmap of gene expression  
9 values for PatternMarker genes identified for all of these patterns. Rows were colored according to  
0 which CoGAPS pattern the PatternMarker statistic assigned each gene, and sorted by the  
1 PatternMarker statistic.

2 **Supplemental Figure 6** – Heatmap of gene set analysis scores for targets of transcription factors in  
3 the EGFR network, targets of the AP-2alpha transcription factors associated with cetuximab  
4 response, and cetuximab resistance signatures in CoGAPS patterns. A score of 100 indicated  
5 upregulation of the targets with a p-value of 0 and -100 downregulation with p-values of 0. Matrix  
6 elements with a star indicated p-values below 0.05 for either up or down-regulation of the gene set.

7 Gene expression heatmap was colored on a red-green scale where as the gene set statistics  
8 heatmap was colored on a blue-red scale, with values indicated in the respective color keys.

9 **Supplemental Figure 7 – A.** Heatmap of Pearson correlation coefficients between CoGAPS gene  
0 expression and DNA methylation patterns. Row colors for expression patterns match the colors for  
1 patterns in Figure 2,3. The column colors for methylation patterns are selected to match the color of  
2 the corresponding expression pattern with maximum anti-correlation. **B.** As in **A** for CoGAPS gene  
3 weights (meta-pathway values) corresponding to patterns in DNA methylation (columns) and gene  
4 expression (rows).

5 **Supplemental Figure 8 –** Heatmap of gene expression values for 11 generations of SCC25 cells  
6 treated with PBS as control (black columns labeled PBS) and with 100nM of cetuximab (red  
7 columns labeled cetuximab) to acquire resistance and gene expression data from independent,  
8 stable cetuximab resistant clones in absence of cetuximab treatment (CTX resistant clones).

9 **Supplemental Figure 9 –** Heatmap of DNA methylation values for 11 generations of SCC25 cells  
0 treated with PBS as control (black columns labeled PBS) and with 100nM of cetuximab (red  
1 columns labeled cetuximab) to acquire resistance and gene expression data from independent,  
2 stable cetuximab resistant clones in absence of cetuximab treatment (CTX resistant clones).

3 **Supplemental Figure 10 –** Brightfield microscopy images of the representative clones' morphology  
4 above with corresponding clone specific CoGAPS patterns of DNA methylation above.

5 **Supplemental Figure 11 –** Epigenetically regulated pattern marker genes associated with  
6 resistance having significant anti-correlation between gene expression and DNA methylation in the  
7 cetuximab single cell resistant clones.

8 **Supplemental Figure 12 –** Cell proliferation assay using AlamarBlue (Invitrogen, Carlsbad, CA) to  
9 compare proliferation rates under different concentrations of cetuximab in the resistant single cell  
0 clones (CTXR4, 7, 10 and 11) and the parental SCC25 cell line to confirm resistance when treated  
1 with different concentrations of cetuximab.

2

# Proliferation assay

CLINICAL  
EVOLUTION

bioRxiv preprint doi: <https://doi.org/10.1101/176564>; this version posted August 1, 2017. The copyright holder for this preprint (which was not certified by peer review) is the author/funder, who has granted bioRxiv a license to display the preprint in perpetuity. It is made available under aCC-BY-NC-ND 4.0 International license.

Unobservable clinical states

Stable tumor size

**RESPONSE TO CETUXIMAB**

Tumor reduction

**RESPONSE TO  
CETUXIMAB**

Tumor growth / Disease recurrence

**ACQUIRED CETUXIMAB RESISTANCE**

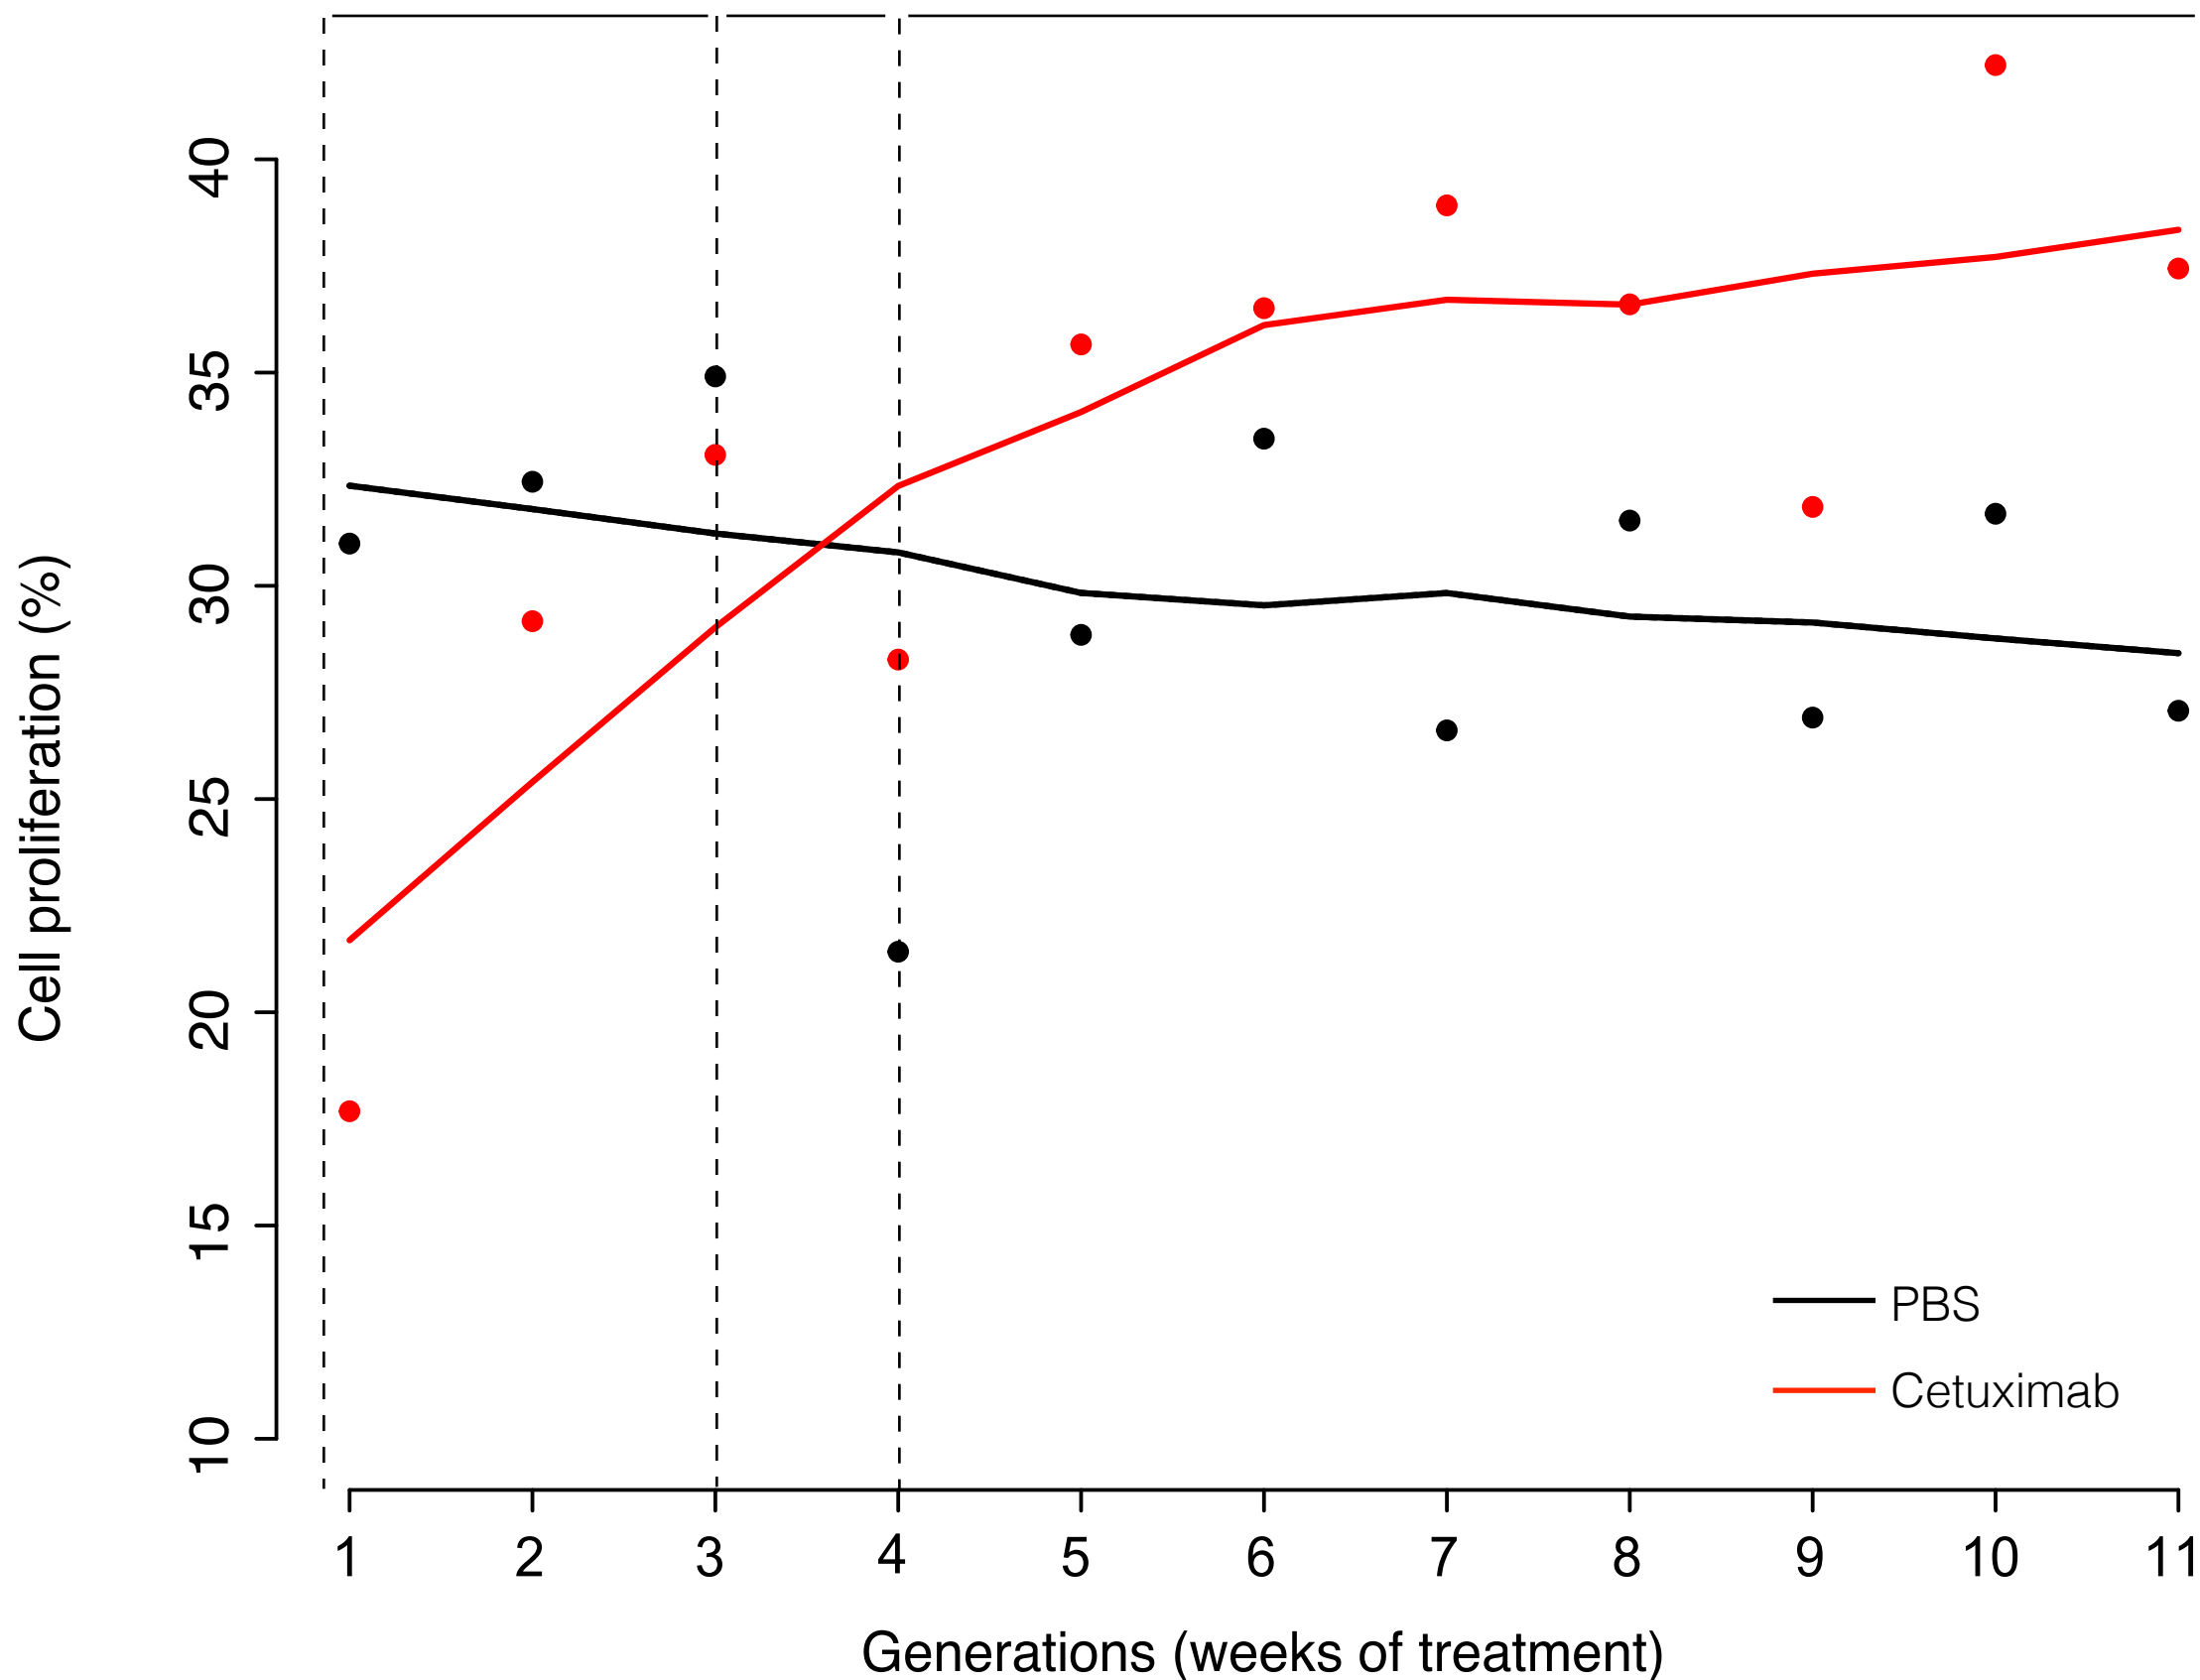

### A Clustering of gene expression data

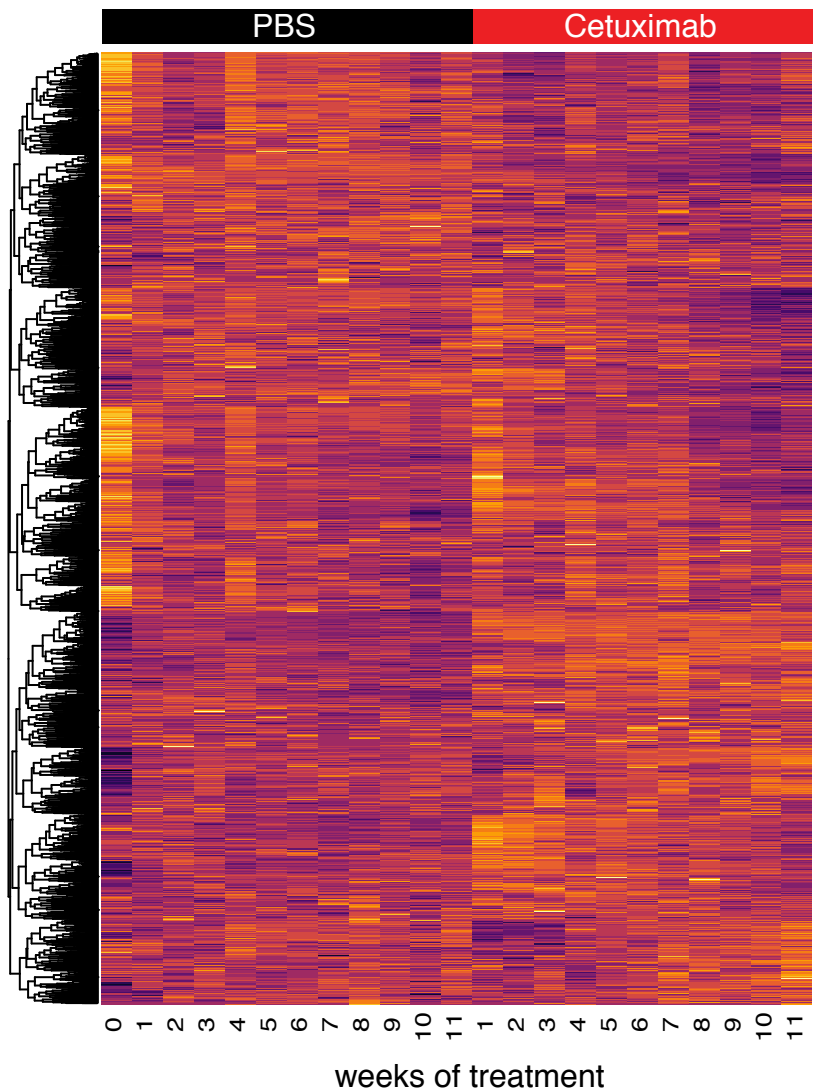

### CoGAPS analysis of gene expression data

B Expression of PatternMarker genes for CoGAPS expression patterns

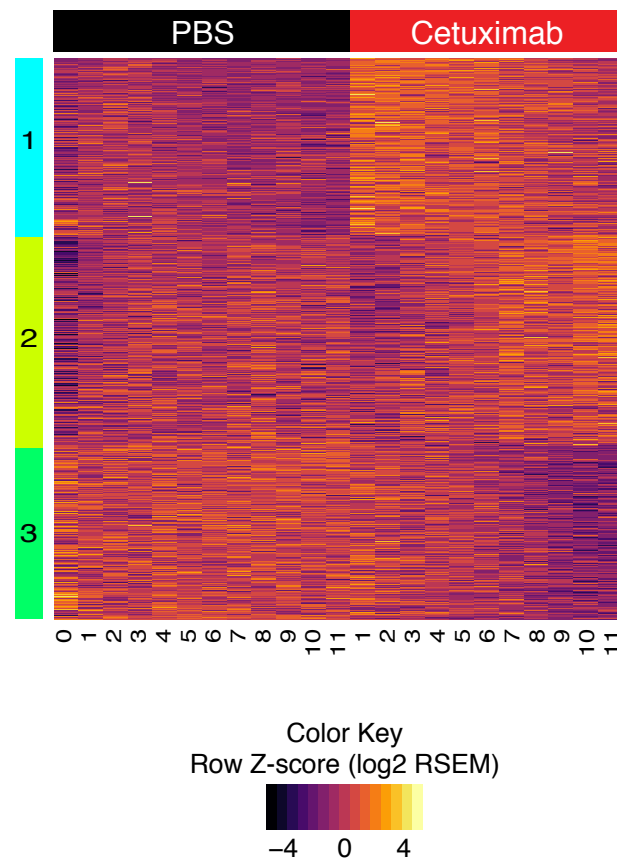

C CoGAPS expression patterns (sample weights v. time)

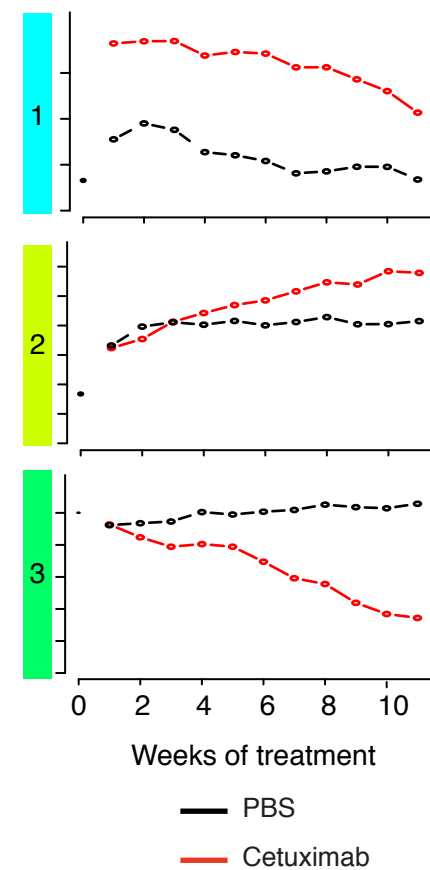

## A Clustering of DNA methylation data

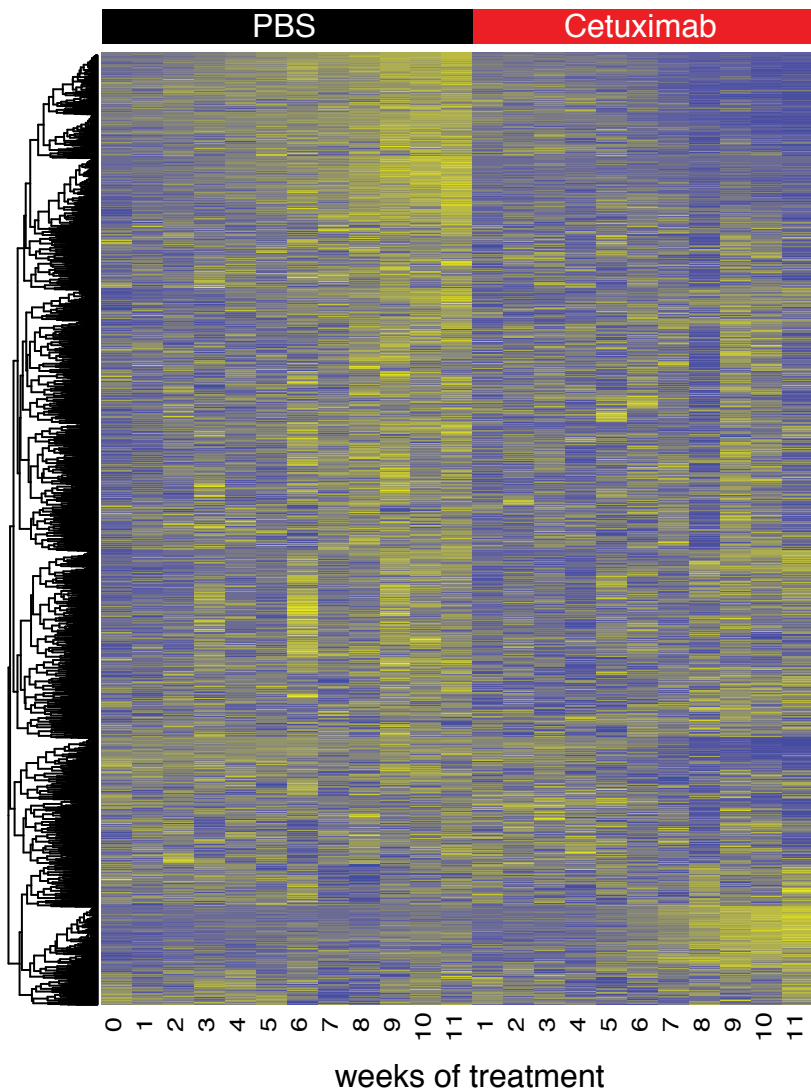

## CoGAPS analysis of DNA methylation data

B DNA methylation of PatternMarker genes for CoGAPS methylation patterns

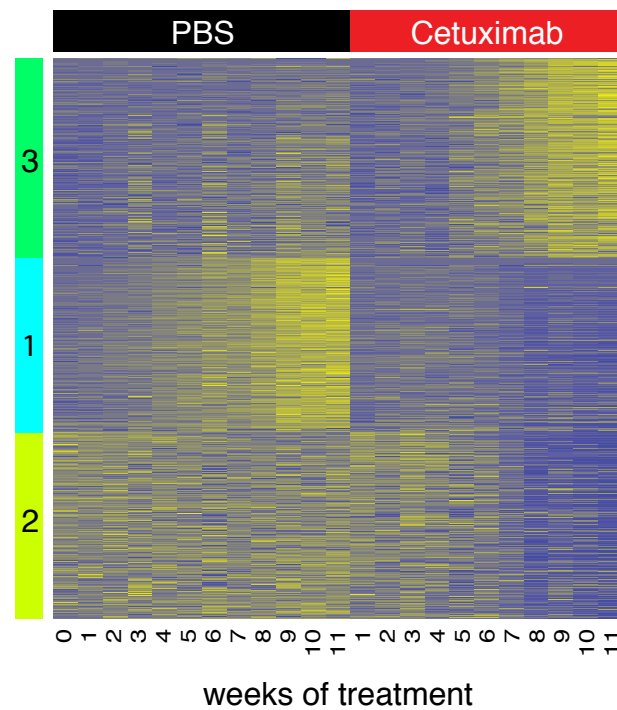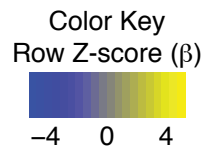

C CoGAPS DNA methylation patterns (sample weights v. time)

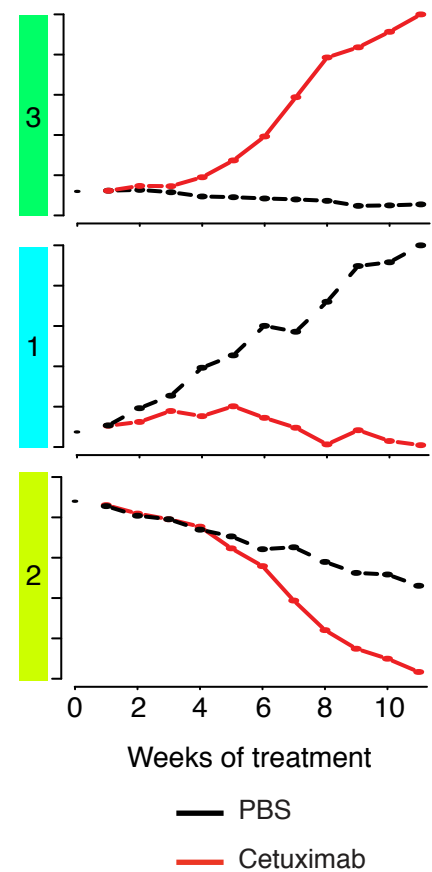

# Timing of separation in CTX and PBS

CoGAPS Patterns

Expression  
Methylation

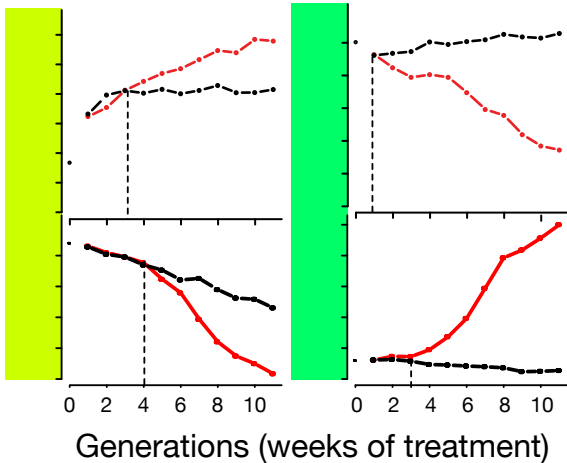

# PatternMarker genes for CoGAPS methylation patterns that are anti-correlated with expression in time course data

A Gene expression in time course and resistant clones

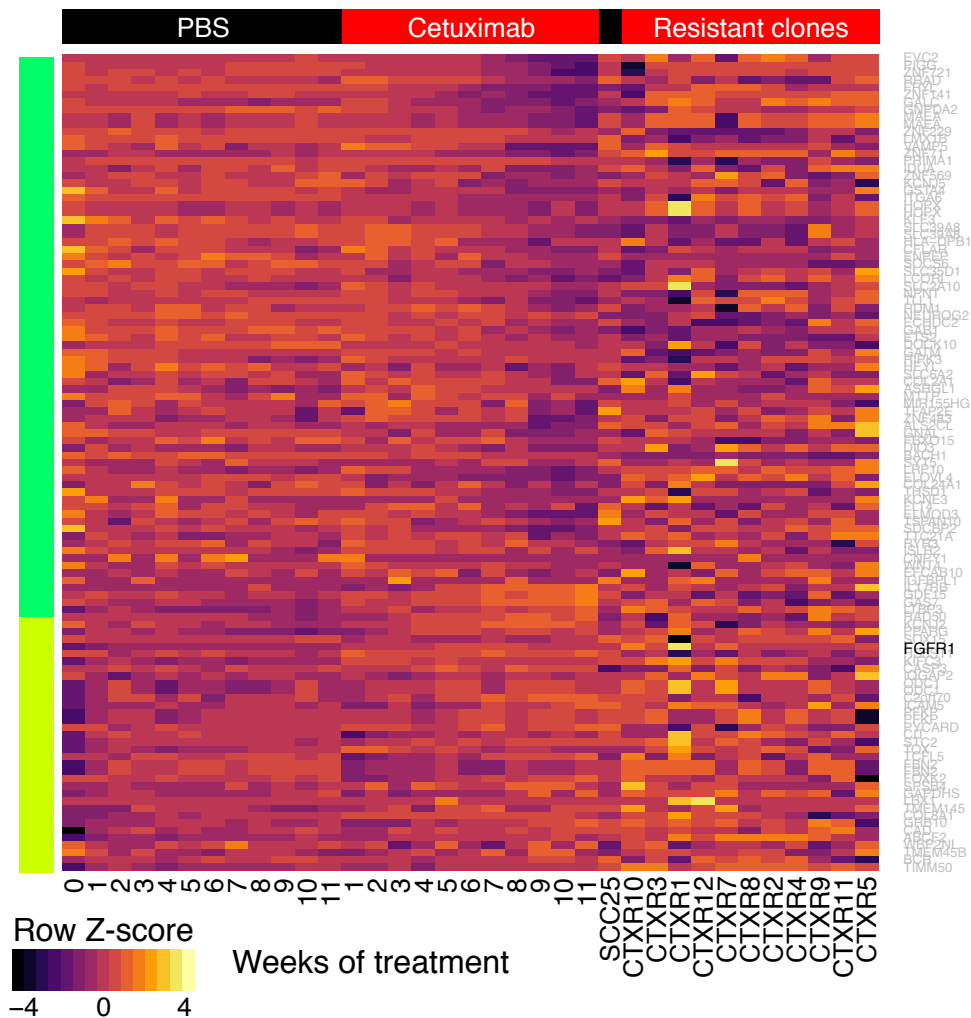

B DNA methylation in time course and resistant clones

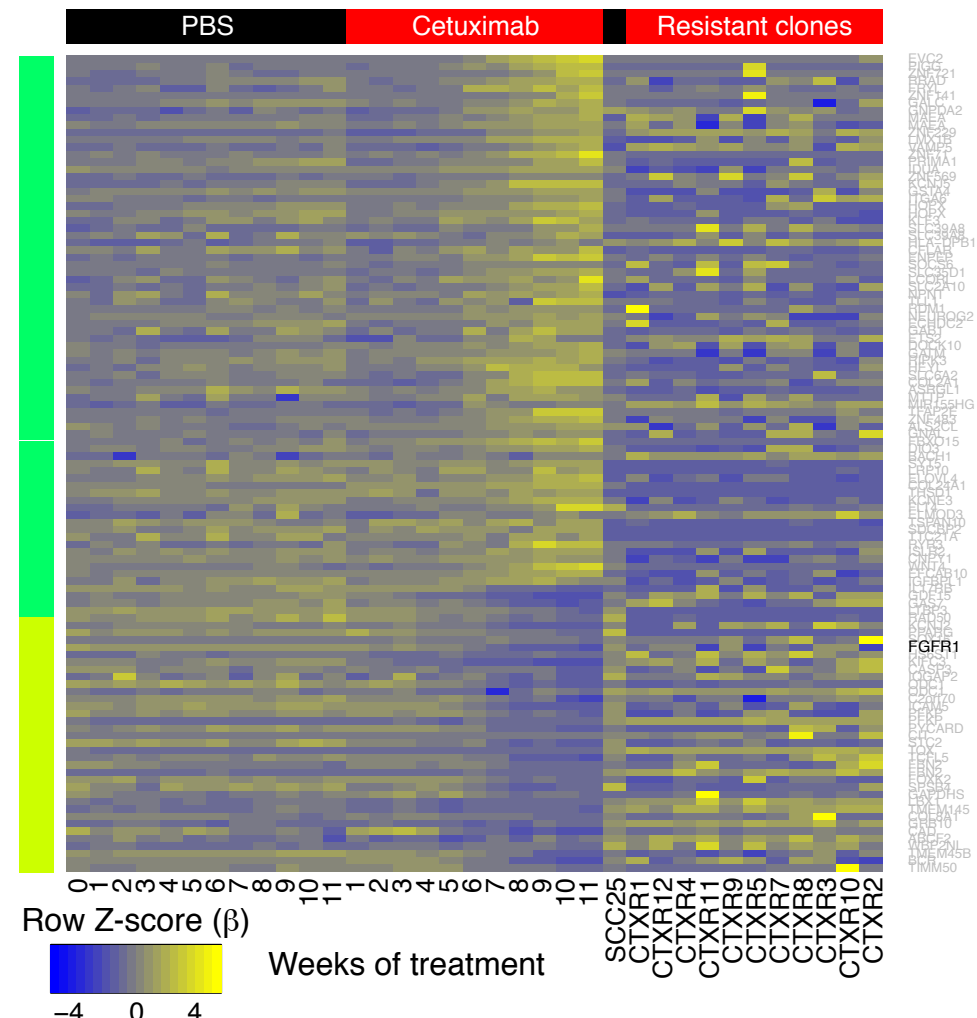

# FGFR1 gene expression vs DNA methylation in resistant clones

A

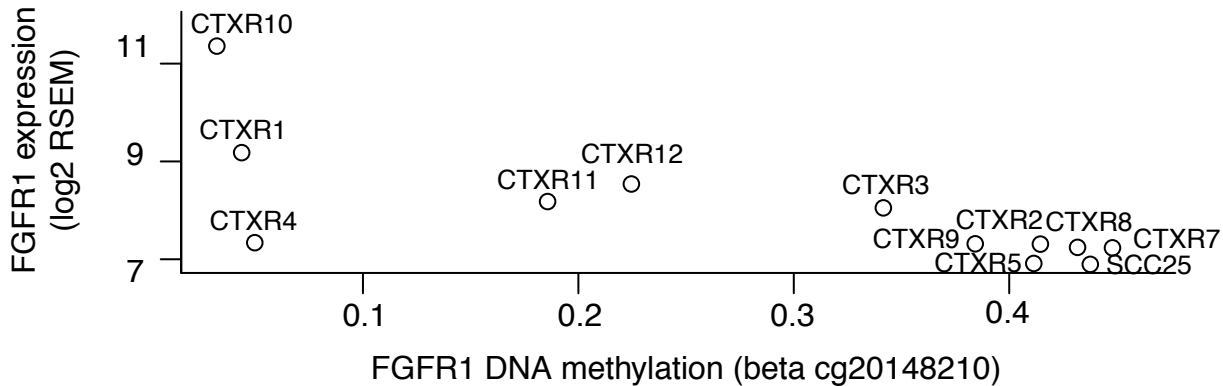

B FGFR1 gene expression

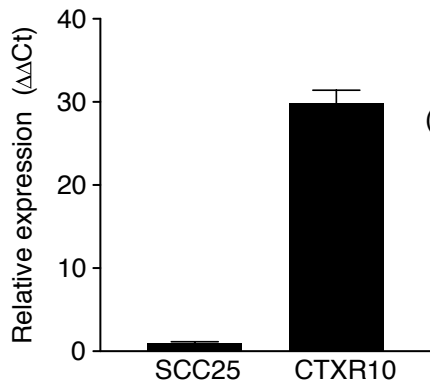

C

Protein expression

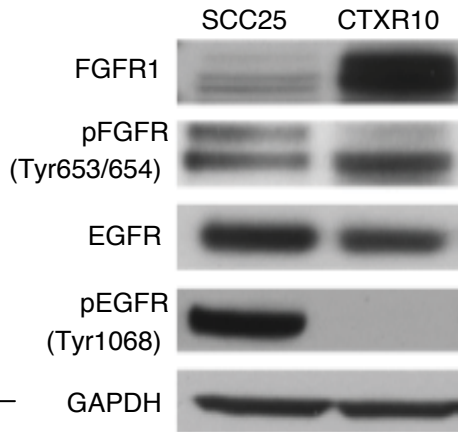



**A** *FGFR1* and *EGFR* gene expression in HNSCC and normal samples (TCGA)

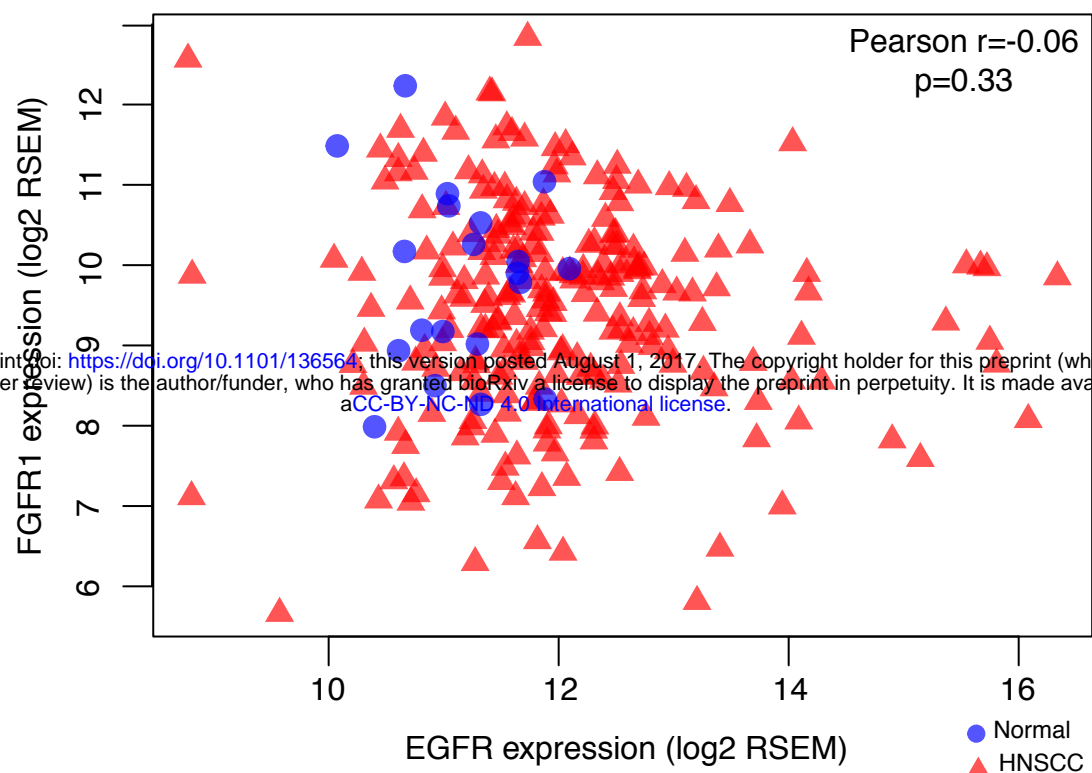

**B** *FGFR1* gene expression and DNA methylation in HNSCC and normal samples (TCGA)

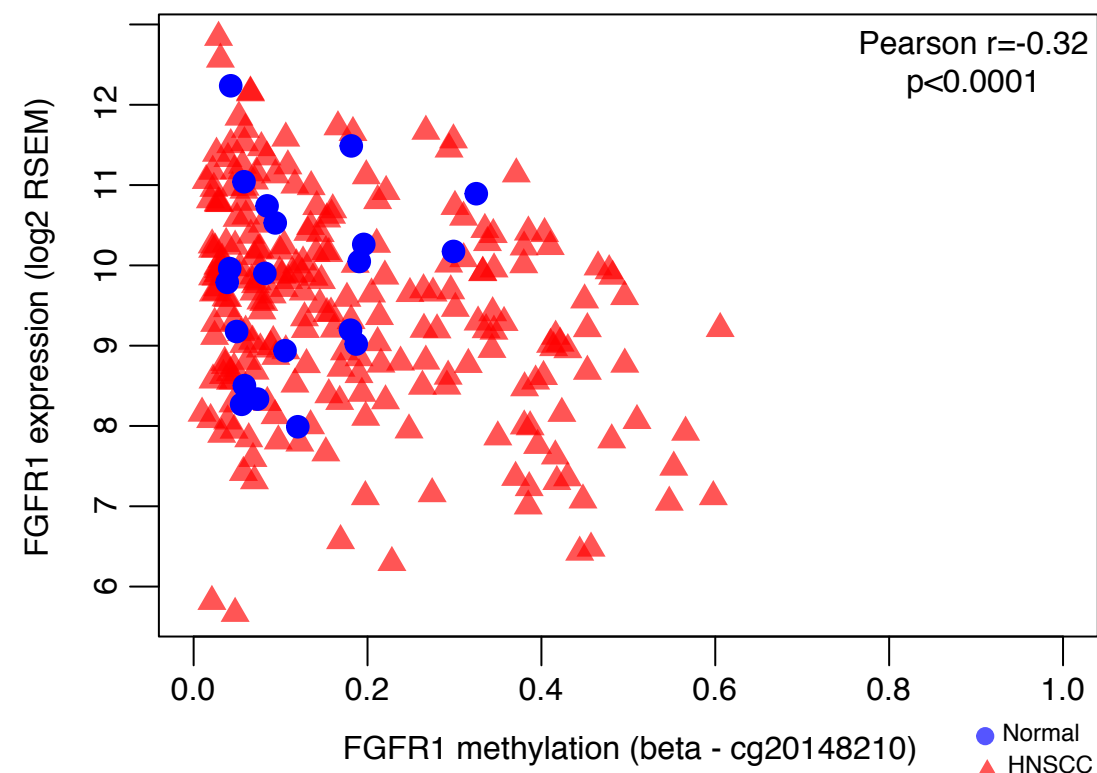

**C** *EGFR* gene expression in HNSCC with LPFS and SPFS

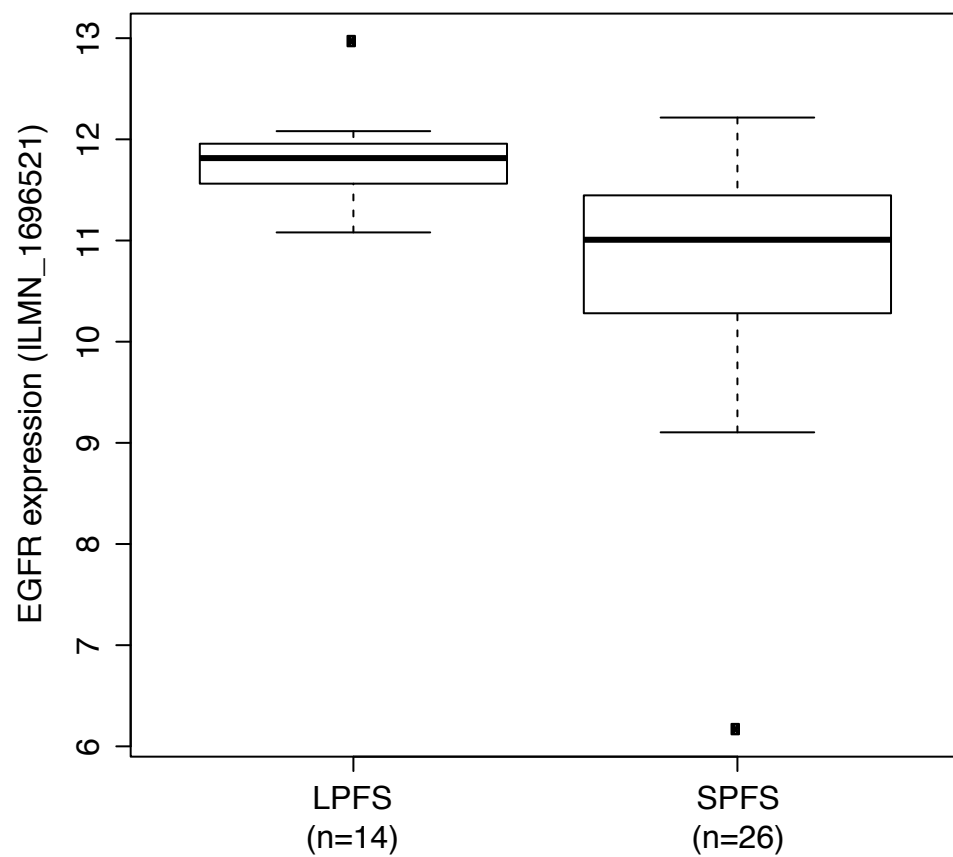

**D** *FGFR1* gene expression in HNSCC with LPFS and SPFS

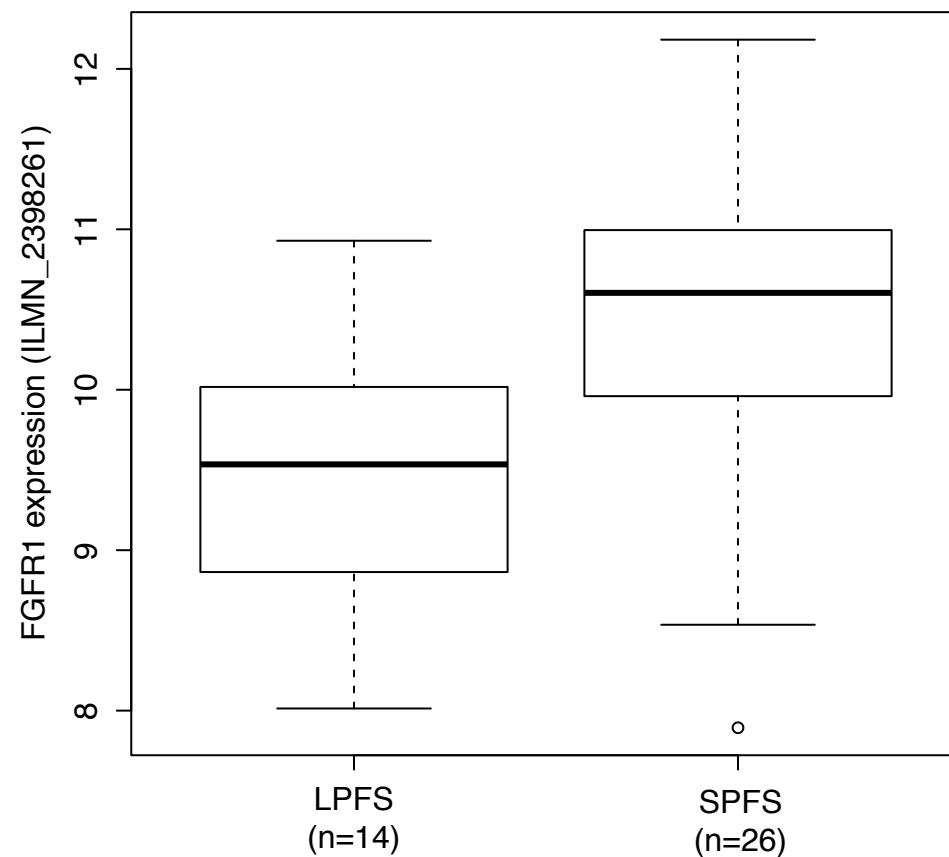

Source: https://www.biorxiv.org/content/10.1101/136564v5.full.pdf
